# Supplementary material
Source: PubMed Central journal article supplement (PMC3483018)
Supplement: jm300952s_si_001.pdf [file jm300952s_si_001.pdf]

## Supporting Information

Optimisation of Imidazo[4,5-*b*]pyridine-based Kinase Inhibitors: Identification of a Dual FLT3/Aurora Kinase Inhibitor as an Orally Bioavailable Preclinical Development Candidate for the Treatment of AML

Vassilios Bavetsias,<sup>\*1</sup> Simon Crumpler,<sup>1</sup> Chongbo Sun,<sup>1</sup> Sian Avery<sup>1</sup>, Butrus Atrash,<sup>1</sup> Amir Faisal,<sup>1</sup> Andrew S. Moore,<sup>1,2</sup> Magda Kosmopoulou,<sup>3</sup> Nathan Brown,<sup>1</sup> Peter W. Sheldrake,<sup>1</sup> Katherine Bush,<sup>1</sup> Alan Henley,<sup>1</sup> Gary Box,<sup>1</sup> Melanie Valenti,<sup>1</sup> Alexis de Haven Brandon,<sup>1</sup> Florence I. Raynaud,<sup>1</sup> Paul Workman,<sup>1</sup> Suzanne A. Eccles,<sup>1</sup> Richard Bayliss,<sup>3,4</sup> Spiros Linardopoulos,<sup>1,5</sup> Julian Blagg<sup>\*1</sup>

<sup>1</sup>Cancer Research UK Cancer Therapeutics Unit, Division of Cancer Therapeutics, The Institute of Cancer Research, 15 Cotswold Road, Sutton, Surrey, SM2 5NG, United Kingdom.

<sup>2</sup>Current address: Queensland Children's Medical Research Institute, Royal Children's Hospital, Herston Rd, Herston, QLD, 4029, Australia.

<sup>3</sup>Division of Structural Biology, The Institute of Cancer Research, Chester Beatty Laboratories, 237 Fulham Road, London, SW3 6JB, United Kingdom.

<sup>4</sup>Current address: University of Leicester, Department of Biochemistry, Lancaster Road, Leicester LE1 9HN, United Kingdom.

<sup>5</sup>The Breakthrough Breast Cancer Research Centre, Division of Breast Cancer Research, The Institute of Cancer Research, Fulham Road, London SW3 6JB, United Kingdom.

pp 2-33: Experimental procedures for compounds **11-13, 9b,d, 9e, 10a-e, 17, 19a,b, 20a-e, 21b-h, 22a-c, 22e, 24b,d,f,g, 25b,d,f,g, 26a-d, 26f,g, 27a-d, 27f,g.**

pp 34: Table S1: Summary of crystallographic analysis for compound **21a.**

pp 35-44: Table S2: kinase selectivity profiling of compound **27e** tested at 1  $\mu\text{M}$ .

Total number of pages: 44

E-mail: [vassilios.bavetsias@icr.ac.uk](mailto:vassilios.bavetsias@icr.ac.uk) and [julian.blagg@icr.ac.uk](mailto:julian.blagg@icr.ac.uk)

#### **4-Chloro-3-nitropyridin-2-amine**<sup>35</sup> (**11**)

To a 100 mL round-bottomed flask containing 2-amino-4-chloropyridine (0.480 g, 3.75 mmol) and cooled in an ice bath was added concentrated sulphuric acid (5.4 g). The reaction mixture was stirred for 5 min and then nitric acid (70%; 0.36 g) was added dropwise. The reaction mixture was stirred at 0 °C for 10 min, then heated to 55 °C and stirred at this temperature for 1 h. It was cooled to room temperature and diluted with ice-water. The pH was carefully adjusted to ~ 7.5 with 10% aqueous NaOH whereupon a yellow precipitate formed. This was filtered off, washed with water and dried *in vacuo* over P<sub>2</sub>O<sub>5</sub>. The product was purified by silica column chromatography (elution with DCM) to provide in order of elution: 4-chloro-3-nitropyridin-2-amine as a yellow solid (0.210 g, 32%): <sup>1</sup>H-NMR (500 MHz, DMSO-d<sub>6</sub>) 6.87 (d, J = 5.2 Hz, 1H, pyridine C-H), 7.21 (s, 2H, NH<sub>2</sub>), 8.11 (d, J = 5.2

Hz, 1H, pyridine C-H); and 4-chloro-5-nitropyridin-2-amine (0.080 g, 12%): <sup>1</sup>H-NMR (500 MHz, DMSO-d<sub>6</sub>) 6.58 (s, 1H, pyridine C-H), 7.58 (s, 2H, NH<sub>2</sub>), 8.79 (s, 1H, pyridine C-H).

#### **5-Bromo-4-chloro-3-nitropyridin-2-amine (13)**

4-Chloro-3-nitropyridin-2-amine (0.10 g, 0.58 mmol) was dissolved in dry acetonitrile (20 mL). *N*-Bromosuccinimide (0.124 g, 0.70 mmol) was added to the stirred solution, and the reaction mixture heated at 80 °C for 1 h. Volatiles were removed *in vacuo* and the residue purified by silica column chromatography (elution with DCM) to provide the product as a pale brown powder (0.125 g, 85%). <sup>1</sup>H-NMR (500 MHz, DMSO-d<sub>6</sub>) 7.35 (s, 2H, NH<sub>2</sub>), 8.41 (s, 1H, 6-H).

#### **4,5-Dichloro-3-nitropyridin-2-amine (12)**

4-Chloro-3-nitropyridin-2-amine (0.10 g, 0.58 mmol) was dissolved in dry acetonitrile (20 mL). *N*-Chlorosuccinimide (0.094 g, 0.70 mmol) was added to the stirred solution, and the reaction mixture was heated at 80 °C for 1 h. Volatiles were removed *in vacuo* and the residue purified by silica column chromatography (elution with DCM) to provide the product as a pale brown powder (0.125 g, 85%). <sup>1</sup>H-NMR (500 MHz, DMSO-d<sub>6</sub>) 7.35 (s, 2H, NH<sub>2</sub>), 8.36 (s, 1H, 6-H).

#### **4-(4-Acetylpiperazin-1-yl)benzaldehyde (9b)**

To a solution of *tert*-butyl 4-(4-formylphenyl)piperazine-1-carboxylate (0.102 g, 0.35 mmol) in dichloromethane (2.5 mL) was added trifluoroacetic acid (1.0 mL). The reaction mixture

was stirred at room temperature for 1.5 h before being concentrated in vacuo. The resulting residue was dissolved in anhydrous dichloromethane (3.5 mL) under argon, and the solution was cooled to 0 °C. A solution of acetyl chloride (0.050 g, 0.64 mmol) in anhydrous dichloromethane (1 mL) was then slowly added followed by diisopropylethylamine (0.18 mL, 1.05 mmol). The clear solution was stirred for 4 h under argon and allowed to warm to room temperature. The solvents were removed *in vacuo*, the residue was absorbed on silica gel and placed on a 10 g isolute silica column. Elution with a gradient of ethyl acetate in dichloromethane (20 to 50%) afforded the desired product as a white solid (0.052 g, 64%). <sup>1</sup>H-NMR (500 MHz, DMSO-d<sub>6</sub>) 2.04 (s, 3H, COCH<sub>3</sub>), 3.39 (t, J = 5.6 Hz, 2H), 3.46 (t, J = 5.6 Hz, 2H) and 3.57 (m, 4H) (piperazine C-H), 7.05 (d, J = 8.9 Hz, 2H) and 7.72 (d, J = 8.9 Hz, 2H) (2,6-C<sub>6</sub>H<sub>4</sub> and 3,5-C<sub>6</sub>H<sub>4</sub>), 9.72 (s, 1H, CHO); LC - MS (ESI, *m/z*): Rt = 1.73 min – 233 [(M+H)<sup>+</sup>].

**1-(4-(4-(6-Bromo-7-(4-((5-methylisoxazol-3-yl)methyl)piperazin-1-yl)-3H-imidazo[4,5-b]pyridin-2-yl)phenyl)piperazin-1-yl)ethanone (10b)**

To a mixture of 5-bromo-4-(4-((5-methylisoxazol-3-yl)methyl)piperazin-1-yl)-3-nitropyridin-2-amine (0.056 g, 0.14 mmol) and EtOH (6 mL) was added 4-(4-acetylpiperazin-1-yl)benzaldehyde (0.042 g, 0.18 mmol) followed by a freshly prepared aqueous solution of Na<sub>2</sub>S<sub>2</sub>O<sub>4</sub> (1M; 0.56 mL, 0.56 mmol). The reaction mixture was stirred at 80 °C for 20 h, then allowed to cool to room temperature and concentrated *in vacuo*. The residue was absorbed on silica gel, and the free-running powder was placed on a 10 g isolute silica column and eluted with a gradient of methanol (0 to 8%) in ethyl acetate / dichloromethane (v:v; 1:1). After trituration with diethyl ether, the precipitate was collected by filtration and washed with water and diethyl ether to afford the title compound as a pale yellow solid (0.028 g, 35%). <sup>1</sup>H-

NMR (500 MHz, DMSO- $d_6$ ) 2.05 (s, 3H, COCH<sub>3</sub>), 2.40 (s, 3H, isoxazole 5-CH<sub>3</sub>), 2.62 (br s, 4H), 3.25 (br t, J = 5.0 Hz, 2H), 3.31 (m obscured by water peak), 3.59 (br s, 6H), and 3.62 (br s, 4H) (piperazine C-H and N-CH<sub>2</sub>-isoxazole), 6.25 (s, 1H, 4-H isoxazole), 7.08 (d, J = 9.0 Hz, 2H) and 8.04 (d, J = 8.9 Hz, 2H) (2,6-C<sub>6</sub>H<sub>4</sub> and 3,5-C<sub>6</sub>H<sub>4</sub>), 8.18 (s, 1H, imidazo[4,5-*b*]pyridine 5-H), 13.27 (br s, 1H, imidazo[4,5-*b*]pyridine N-H); LC - MS (ESI, *m/z*): Rt = 2.03 min – 579, 581 [(M+H)<sup>+</sup>, Br isotopic pattern]; HRMS: Found: 579.1819, calculated for C<sub>27</sub>H<sub>32</sub>BrN<sub>8</sub>O<sub>2</sub> (M+H)<sup>+</sup>: 579.1826.

**4-(4-(6-Bromo-7-(4-((5-methylisoxazol-3-yl)methyl)piperazin-1-yl)-3H-imidazo[4,5-*b*]pyridin-2-yl)phenyl)morpholine (10a)**

To a mixture of 5-bromo-4-(4-((5-methylisoxazol-3-yl)methyl)piperazin-1-yl)-3-nitropyridin-2-amine (0.060 g, 0.15 mmol) and EtOH (6 mL) was added 4-(morpholin-4-yl)benzaldehyde (0.036 g, 0.19 mmol) followed by a freshly prepared aqueous solution of Na<sub>2</sub>S<sub>2</sub>O<sub>4</sub> (1M; 0.6 mL, 0.6 mmol). The reaction mixture was stirred at 80 °C for 18 h, then allowed to cool to room temperature and concentrated *in vacuo*. The residue was absorbed on silica gel, and the free-running powder was placed on a 10 g isolute silica column. Elution with a gradient of methanol (0 to 4%) in ethyl acetate / dichloromethane (v:v; 1:1) afforded the title compound as a white solid after trituration with diethyl ether (0.031 g, 39%). <sup>1</sup>H-NMR (500 MHz, DMSO- $d_6$ ) 2.40 (s, 3H, isoxazole 5-CH<sub>3</sub>), 2.62 (br s, 4H), 3.24 (br t, J = 4.8 Hz, 4H), 3.62 (br t, J = 4.5 Hz, 4H) and 3.75 (t, J = 5.0 Hz, 4H) (piperazine N-CH and morpholine CH), 3.59 (s, 2H, N-CH<sub>2</sub>-isoxazole), 6.25 (s, 1H, 4-H isoxazole), 7.08 (d, J = 9.0 Hz, 2H) and 8.04 (d, J = 8.9 Hz, 2H) (2,6-C<sub>6</sub>H<sub>4</sub> and 3,5-C<sub>6</sub>H<sub>4</sub>), 8.18 (s, 1H, imidazo[4,5-*b*]pyridine 5-H), 13.27 (br s, 1H, imidazo[4,5-*b*]pyridine N-H); LC - MS (ESI, *m/z*): Rt = 2.12 min – 538, 540

[(M+H)<sup>+</sup>, Br isotopic pattern]; HRMS: Found: 538.1549, calculated for C<sub>25</sub>H<sub>29</sub>BrN<sub>7</sub>O<sub>2</sub>  
(M+H)<sup>+</sup>: 538.1561.

#### **4-(4-(2-Methoxyethyl)piperazin-1-yl)benzaldehyde (9d)**

To a mixture of 4-bromobenzylaldehyde diethyl acetal (0.518 g, 2.0 mmol) and anhydrous toluene (4 mL) was added 1-(2-methoxyethyl)piperazine (0.345 g, 2.4 mmol) followed by Pd<sub>2</sub>(dba)<sub>3</sub> (0.018 g, 0.02 mmol), racemic BINAP (0.037 g, 0.06 mmol) and NaO<sup>t</sup>Bu (0.326 g, 3.4 mmol). The reaction mixture was placed into an oil bath preheated to 100 °C and stirred at this temperature for 7.5 h under argon, then allowed to cool to room temperature. Aqueous HCl (1M; 10 mL) was added, the mixture was vigorously stirred for 2.5 h, then the pH adjusted to 13 with aqueous NaOH and extracted with ethyl acetate (3 x 40 mL). The combined organics were dried (Na<sub>2</sub>SO<sub>4</sub>), concentrated in vacuo and the residue absorbed on silica gel and placed on a 20 g isolate column. Elution with a gradient of methanol (0 to 4%) in ethyl acetate / dichloromethane (v/v; 1:1) afforded the title compound as an oil (0.130 g, 26%). <sup>1</sup>H-NMR (500 MHz, DMSO-d<sub>6</sub>) 2.56 (m, 6H, piperazine C-H and CH<sub>2</sub>CH<sub>2</sub>OMe), 3.26 (s, 3H, OMe), 3.38 (t, J = 5.0 Hz, 4H, piperazine C-H), 3.48 (t, J = 5.8 Hz, 2H, CH<sub>2</sub>OMe), 7.04 (d, J = 8.8 Hz, 2H) and 7.71 (d, J = 8.8 Hz, 2H) (2,6-C<sub>6</sub>H<sub>4</sub> and 3,5-C<sub>6</sub>H<sub>4</sub>), 9.72 (s, 1H, CHO); LC - MS (ESI, *m/z*): Rt = 0.95 min – 249 (M+H)<sup>+</sup>.

#### **3-((4-(6-Bromo-2-(4-(4-(2-methoxyethyl)piperazin-1-yl)phenyl)-3H-imidazo[4,5-*b*]pyridin-7-yl)piperazin-1-yl)methyl)-5-methylisoxazole (10d)**

To a mixture of 5-bromo-4-(4-((5-methylisoxazol-3-yl)methyl)piperazin-1-yl)-3-nitropyridin-2-amine (0.052 g, 0.13 mmol) and EtOH (6.0 mL) was added 4-(4-(2-

methoxyethyl)piperazin-1-yl)benzaldehyde (0.042 g, 0.17 mmol) followed by a freshly prepared aqueous solution of Na<sub>2</sub>S<sub>2</sub>O<sub>4</sub> (1M; 0.50 mL, 0.50 mmol). The reaction mixture was stirred at 80 °C for 20 h, then allowed to cool to room temperature and concentrated *in vacuo*. The residue was absorbed on silica gel, and placed on a 10 g isolute silica column which was eluted with dichloromethane and then a gradient of methanol (2 to 7%) in ethyl acetate / dichloromethane (v:v; 1:1). Fractions containing the product were combined and concentrated *in vacuo*. The resulting solid residue was triturated with diethyl ether, and the title compound was isolated as a white solid by filtration and washed with diethyl ether (2 x 7 mL), water (3 x 2 mL), and diethyl ether (3 x 4 mL) (0.022 g, 25%). <sup>1</sup>H-NMR (500 MHz, DMSO-d<sub>6</sub>) 2.40 (s, 3H, isoxazole 5-CH<sub>3</sub>), 2.52 (t, J = 5.7 Hz, 2H, CH<sub>2</sub>CH<sub>2</sub>OMe), 2.56 (br s, 4H, piperazine C-H), 2.62 (br s, 4H, piperazine C-H), 3.25 (m, 7H, piperazine C-H and OMe), 3.47 (t, J = 5.7 Hz, 2H, CH<sub>2</sub>CH<sub>2</sub>OMe), 3.59 (s, 2H, N-CH<sub>2</sub>-isoxazole) 3.62 (br t, J = 4.2 Hz, 4H, piperazine C-H), 6.25 (s, 1H, isoxazole 4-H), 7.05 (d, J = 8.9 Hz, 2H) and 8.02 (d, J = 8.9 Hz, 2H) (2,6-C<sub>6</sub>H<sub>4</sub> and 3,5-C<sub>6</sub>H<sub>4</sub>), 8.17 (s, 1H, imidazo[4,5-*b*]pyridine 5-H), 13.25 (br s, 1H, imidazo[4,5-*b*]pyridine N-H); LC - MS (ESI, *m/z*): Rt = 1.60 min – 595, 597 [(M+H)<sup>+</sup>, Br isotopic pattern]; HRMS: Found: 595.2132, calculated for C<sub>28</sub>H<sub>36</sub>BrN<sub>8</sub>O<sub>2</sub> (M+H)<sup>+</sup>: 595.2139.

### **(S)-tert-Butyl 3,4-dimethylpiperazine-1-carboxylate (17)**

To a solution of (S)-tert-butyl-3-methylpiperazine-1-carboxylate (349 mg, 1.74 mmol) in MeOH/THF (15 mL each) was added formaldehyde 33% in H<sub>2</sub>O (471 μL, 5.23 mmol) followed by Na(OAc)<sub>3</sub>BH (369 mg, 1.74 mmol). The reaction was stirred for 18 h before being concentrated *in vacuo* and dry loaded onto silica. Purification was accomplished by flash chromatography on silica gel (3 x 11) eluting with MeOH/CH<sub>2</sub>Cl<sub>2</sub> (10-20%) to yield the

title compound (352 mg, 94%). <sup>1</sup>H-NMR (500 MHz, CDCl<sub>3</sub>) 1.02 (d, *J* = 6.2 Hz, 3H, CHCH<sub>3</sub>), 1.43 (s, 9H, -C(CH<sub>3</sub>)<sub>3</sub>), 2.00 (dq, *J* = 9.8, 6.2, 3.3 Hz, 1H, CHCH<sub>3</sub>), 2.13 (td, *J* = 11.5, 3.4 Hz, 1H, CH<sub>2</sub>), 2.26 (s, 3H, NCH<sub>3</sub>), 2.58 (br s, 1H, CH<sub>2</sub>), 2.69 (app d, *J* = 11.5 Hz, 1H, CH<sub>2</sub>), 2.99 (t, *J* = 11.5 Hz, 1H, -CH<sub>2</sub>), 3.93-3.68 (m, 2H, CH<sub>2</sub>); LC - MS (ESI, *m/z*): Rt = 1.20 min - 159 (M - <sup>t</sup>Bu)<sup>+</sup>.

#### (*S*)-4-(3,4-Dimethylpiperazin-1-yl)benzaldehyde (**9e**)

To a solution of (*S*)-*tert*-butyl-3,4-dimethylpiperazine-1-carboxylate (324 mg, 1.51 mmol) in CH<sub>2</sub>Cl<sub>2</sub> (40 mL) was added TFA (4.00 mL, 54.0 mmol) and the solution was stirred at room temperature for 2 h. The reaction was concentrated *in vacuo*, azeotroping with toluene (x2), to give a yellow oil. The residue was dissolved in DMSO (3.0 mL) and DIPEA (1.10 mL, 6.04 mmol) was added followed by 4-fluorobenzaldehyde (194 μL, 1.81 mmol). The solution was stirred at 120 °C for 2 h. On cooling the reaction was partitioned between EtOAc/H<sub>2</sub>O (100 mL), the separated organic layer was washed with H<sub>2</sub>O (100 mL), brine (50 mL), dried over MgSO<sub>4</sub>, filtered and concentrated *in vacuo* to give a crude brown oil. Purification was accomplished by flash chromatography on silica gel (3 x 12) eluting with MeOH/CH<sub>2</sub>Cl<sub>2</sub> (5%) to yield the title compound (121 mg, 0.550 mmol, 37%) as a yellow oil. <sup>1</sup>H-NMR (500 MHz, CDCl<sub>3</sub>) 1.13 (d, *J* = 6.2 Hz, 3H, CHCH<sub>3</sub>), 2.21 (dq, *J* = 9.6, 6.2, 3.2 Hz, 1H, CH<sub>2</sub>), 2.32 (s, 3H, NCH<sub>3</sub>), 2.35 (td, *J* = 11.6, 3.4 Hz, 1H, CH<sub>2</sub>), 2.70 (dd, *J* = 12.4, 10.2 Hz, 1H, CH<sub>2</sub>), 2.88 (td, *J* = 11.6, 2.9 Hz, 1H, CH<sub>2</sub>), 3.08 (td, *J* = 11.9, 3.2 Hz, 1H, CH<sub>2</sub>), 3.65 (ddd, *J* = 12.4, 3.0, 2.1 Hz, 1H, CH<sub>2</sub>), 3.73 (dq, *J* = 12.4, 2.8 Hz, 1H, CH<sub>2</sub>), 6.88 (d, *J* = 8.9 Hz, 2H, CH<sub>ar</sub>), 7.72 (d, *J* = 8.9 Hz, 2H, CH<sub>ar</sub>), 9.76 (s, 1H, CH<sub>ald</sub>); LC - MS (ESI, *m/z*): Rt = 0.97 min - 219 (M + H)<sup>+</sup>.



**(S)-3-((4-(6-Chloro-2-(4-(3,4-dimethylpiperazin-1-yl)phenyl)-3H-imidazo[4,5-b]pyridin-7-yl)piperazin-1-yl)methyl)-5-methylisoxazole (10e)**

To a solution of 5-chloro-4-(4-((5-methylisoxazol-3-yl)methyl)piperazin-1-yl)-3-nitropyridin-2-amine (75.0 mg, 0.212 mmol) and (S)-4-(3,4-dimethylpiperazin-1-yl)benzaldehyde (48.6 mg, 0.223 mmol) in EtOH (5.1 mL) was added 1M Na<sub>2</sub>S<sub>2</sub>O<sub>4</sub> (0.848 mL, 0.848 mmol, freshly prepared) and the solution was heated to 80 °C and stirred for 16 h whilst being open to air. Once cooled, the reaction was evaporated *in vacuo* and the residue dry loaded onto silica. Purification was accomplished by flash chromatography on silica gel (3 x 12) eluting with 2M methanolic NH<sub>3</sub>/CH<sub>2</sub>Cl<sub>2</sub> (5-10%) to give a yellow solid. The solid was triturated with hot EtOAc to yield the title compound (35 mg, 0.067 mmol, 32%) as an off white solid. <sup>1</sup>H-NMR (500 MHz, DMSO-d<sub>6</sub>) 1.08 (d, *J* = 6.2 Hz, 3H, CH<sub>3</sub>), 2.17-2.08 (m, 1H, CHCH<sub>3</sub>), 2.23 (s, 3H, N-CH<sub>3</sub>), 2.23-2.28 (m, 1H, CH<sub>2</sub>), 2.41 (s, 3H, CH<sub>3</sub>), 2.52-2.46 (obs m, 1H, CH<sub>2</sub>), 2.64 (br s, 4H, CH<sub>2</sub>), 2.90-2.81 (m, 2H, CH<sub>2</sub>), 3.60 (s, 2H, CH<sub>2</sub>), 3.75-3.64 (m, 6H, CH<sub>2</sub>), 6.26 (s, 1H, CH<sub>ar</sub>), 7.06 (d, *J* = 8.9 Hz, 2H, CH<sub>ar</sub>), 8.02 (d, *J* = 8.9 Hz, 2H, CH<sub>ar</sub>), 8.05 (1H, s, CH<sub>ar</sub>), 13.19 (s, 1H, NH); LC - MS (ESI, *m/z*): Rt = 1.53 min – 521, 523 [(M + H)<sup>+</sup>, Cl isotopic pattern]; HRMS: Found: 521.2527, calculated for C<sub>27</sub>H<sub>34</sub>N<sub>8</sub>OCl (M+H)<sup>+</sup>: 521.2539.

**3-Fluoro-4-(4-methylpiperazin-1-yl)benzaldehyde (19a)**

A solution of 3,4-difluorobenzaldehyde (0.5g, 3.52 mmol), N-methylpiperazine dihydrochloride (0.60 g, 3.52 mmol) and diisopropylethylamine (1.80 g, 14 mmol) in dimethylsulfoxide (10 mL) was heated at 120 °C for 2 h. The reaction mixture was then cooled to room temperature and partitioned between water (100 mL) and chloroform (60

mL). The aqueous layer was further extracted with ethyl acetate; the organic solutions were combined, dried and concentrated. The crude product was purified by silica column chromatography (1 to 5% methanol in chloroform) to give 0.71 g of the desired product (91%). <sup>1</sup>H NMR (500MHz, CDCl<sub>3</sub>) 2.37 (s, 3 H, NCH<sub>3</sub>), 2.62 (t, J = 5.1 Hz, 4H, NCH<sub>2</sub>), 3.31 (t, J = 5.1 Hz, 4H, NCH<sub>2</sub>), 6.99 (t, J = 7.0 Hz, 1H, ArH), 7.52 (dd, J = 1.8, 13.2 Hz, 1H, ArH), 7.58 (dd, J = 1.9, 8.4 Hz, 1H, ArH), 9.82 (d, J = 2.1 Hz, 1H, CHO); LC - MS (ESI, *m/z*): Rt = 1.08 min, - 223 (M+H)<sup>+</sup>.

**3-((4-(6-Chloro-2-(3-fluoro-4-(4-methylpiperazin-1-yl)phenyl)-3H-imidazo[4,5-*b*]pyridin-7-yl)piperazin-1-yl)methyl)-5-methylisoxazole (20a)**

To a mixture of 5-chloro-4-(4-((5-methylisoxazol-3-yl)methyl)piperazin-1-yl)-3-nitropyridin-2-amine (0.07 g, 0.198 mmol) and EtOH (10mL) was added 3-fluoro-4-(4-methylpiperazin-1-yl)benzaldehyde (0.051 g, 0.23 mmol) followed by a freshly prepared aqueous solution of Na<sub>2</sub>S<sub>2</sub>O<sub>4</sub> (1M; 0.6 mL, 0.6 mmol). The reaction mixture was heated at reflux for 24 h, then allowed to cool to room temperature and concentrated *in vacuo*. The residue was taken up in chloroform and 10% aqueous sodium bicarbonate. The aqueous layer was further extracted with dichloromethane and the combined organic solutions dried and concentrated. The crude product was purified by silica column chromatography eluting with 2 to 10% methanol in dichloromethane. The pure fractions provided 55 mg of product (53%). <sup>1</sup>H-NMR (500 MHz, d<sub>6</sub>-DMSO) 2.23 (s, 3H, piperazine N-Me), 2.40 (s, 3H, isoxazole 5-CH<sub>3</sub>), 2.63 (br s, 4H, piperazine NCH<sub>2</sub>), 3.13 (br s, 4H, piperazine NCH<sub>2</sub>), 3.59 (s, 2H, N-CH<sub>2</sub>-isoxazole), 3.68 (br s, 4 H, piperazine NCH<sub>2</sub>), 6.24 (s, 1H, 4-H isoxazole), 7.15 (t, J = 8.8 Hz, 1H, ArH), 7.95 – 7.86 (m, 2H, ArH), 8.08 (s, 1H, imidazo[4,5-*b*]pyridine 5-H), 13.30 (br s, 1H, imidazo[4,5-

*b*]pyridine N-H); LC - MS (ESI,  $m/z$ ):  $R_t = 1.67$  min – 525, 527 [(M+H)<sup>+</sup>, Cl isotopic pattern]; HRMS: Found: 525.2283; calculated for C<sub>26</sub>H<sub>31</sub>ClFN<sub>8</sub>O (M+H)<sup>+</sup>: 525.2288

### **2-Fluoro-4-(4-methylpiperazin-1-yl)benzaldehyde (19b)**

A solution of 2,4-difluorobenzaldehyde (0.50 g, 3.52 mmol), *N*-methylpiperazine dihydrochloride (0.6 g, 3.52 mmol) and diisopropylethylamine (1.8 g, 14.0 mmol) in dimethylsulfoxide (10 mL) was heated at 120 °C for 2 h. It was then cooled to room temperature and partitioned between water (100 mL) and chloroform (60 mL). The aqueous layer was further extracted with ethyl acetate; the organic solutions were combined, dried and concentrated. The crude was purified by silica column chromatography (1 to 5% methanol in chloroform) to give 0.7 g of product (85%). <sup>1</sup>H NMR (500MHz, CDCl<sub>3</sub>) 2.37 (s, 3 H, NCH<sub>3</sub>), 2.57 (br s, 4H, NCH<sub>2</sub>), 3.40 (t, J = 5.2 Hz, 4H, NCH<sub>2</sub>), 6.45 (dd, J = 14.5, 2.4 Hz, 1H, ArH), 6.64 (dd, J = 8.9, 2.6 Hz, 1H, ArH), 7.70 (t, J = 8.9 Hz, 1H, ArH), 10.06 (s, 1 H, CHO); LC - MS (ESI,  $m/z$ ):  $R_t = 1.00$  min- 223 (M+H)<sup>+</sup>.

### **3-((4-(6-chloro-2-(2-fluoro-4-(4-methylpiperazin-1-yl)phenyl)-3*H*-imidazo[4,5-*b*]pyridin-7-yl)piperazin-1-yl)methyl)-5-methylisoxazole (20b)**

To a mixture of 5-chloro-4-(4-((5-methylisoxazol-3-yl)methyl)piperazin-1-yl)-3-nitropyridin-2-amine (0.1 g, 0.28 mmol) and EtOH (10 mL) was added 2-fluoro-4-(4-methylpiperazin-1-yl)benzaldehyde (0.071 g, 0.32 mmol) followed by a freshly prepared aqueous solution of Na<sub>2</sub>S<sub>2</sub>O<sub>4</sub> (1M; 0.9 mL, 0.9 mmol). The reaction mixture was heated at reflux for 24 h, then allowed to cool to room temperature and concentrated *in vacuo*. The residue was taken up in chloroform and 10% aqueous sodium bicarbonate. The aqueous layer was further extracted

with dichloromethane and the combined organic solutions dried and concentrated. The crude product was purified by silica column chromatography eluting with 3 to 10% methanol in chloroform. The pure fractions provided 40 mg of product (27%). <sup>1</sup>H-NMR (500 MHz, DMSO-d<sub>6</sub>) 2.23 (s, 3H, piperazine N-Me), 2.40 (s, 3H, isoxazole 5-CH<sub>3</sub>), 2.44 (t, J = 4.9 Hz, 4H, piperazine NCH<sub>2</sub>), 2.62 (br s, 4H, piperazine NCH<sub>2</sub>), 3.58 (s, 2H, N-CH<sub>2</sub>-isoxazole), 3.67 (br s, 4H, piperazine NCH<sub>2</sub>), 6.24 (s, 1H, 4-H isoxazole), 6.92 – 6.86 (m, 2H, ArH), 7.90 (t, J = 8.9 Hz, 1H, ArH), 8.08 (s, 1H, imidazo[4,5-*b*]pyridine 5-H), 12.85 (br s, 1H, imidazo[4,5-*b*]pyridine N-H); LC - MS (ESI, *m/z*): Rt = 1.54 min – 525, 527 (M+H)<sup>+</sup>, Cl isotopic pattern; HRMS: Found: 525.2284; calculated for C<sub>26</sub>H<sub>31</sub>ClFN<sub>8</sub>O (M+H)<sup>+</sup> 525.2288.

**2-(3-(6-Chloro-7-(4-((5-methylisoxazol-3-yl)methyl)piperazin-1-yl)-3H-imidazo[4,5-*b*]pyridin-2-yl)phenoxy)-*N,N*-dimethylethanamine (20c)**

To a mixture of 5-chloro-4-(4-((5-methylisoxazol-3-yl)methyl)piperazin-1-yl)-3-nitropyridin-2-amine (0.054 g, 0.15 mmol) and EtOH (10 mL) was added 3-(2-(dimethylamino)ethoxy)benzaldehyde (0.035 g, 0.18 mmol) followed by a freshly prepared aqueous solution of Na<sub>2</sub>S<sub>2</sub>O<sub>4</sub> (1M; 0.45 mL, 0.45 mmol). The reaction mixture was heated at reflux for 24 h, then allowed to cool to room temperature and concentrated *in vacuo*. The residue was taken up in chloroform and 10% bicarbonate. The aqueous layer was further extracted with dichloromethane and the combined organic solutions dried and concentrated. The crude product was purified on an SCX ion-exchange column eluting first with 5% methanol in dichloromethane followed by 1M ammonia in methanol. The pure fractions provided 50 mg of product (66 %). <sup>1</sup>H-NMR (500 MHz, DMSO-d<sub>6</sub>) 2.28 (s, 6H, NMe<sub>2</sub>), 2.40 (s, 3 H, isoxazole 5-CH<sub>3</sub>), 2.64 (br s, 4H, piperazine NCH<sub>2</sub>), 2.70 (t, J = 5.7 Hz, 2H, CH<sub>2</sub>NMe<sub>2</sub>), 3.60 (s, 2 H, CH<sub>2</sub>-isoxazole), 3.71 (br s, 4H, piperazine NCH<sub>2</sub>), 4.15 (t, J = 5.7

Hz, 2H, ArOCH<sub>2</sub>), 6.24 (s, 1H, 4-H isoxazole), 7.09 – 7.07 (m, 1H, ArH), 7.46 – 7.43 (m, 1H, ArH), 7.78 – 7.75 (m, 2H, ArH), 8.11 (s, 1H, imidazo[4,5-*b*]pyridine 5-H), 13.45 (br s, 1H, imidazo[4,5-*b*]pyridine N-H); LC - MS (ESI, *m/z*): 496, 498 [(M+H)<sup>+</sup>, Cl isotopic pattern]; HRMS: Found: 496.2217, calculated for C<sub>25</sub>H<sub>31</sub>ClN<sub>7</sub>O<sub>2</sub> (M+H)<sup>+</sup>: 496.2222

**4-(3-(6-Chloro-7-(4-((5-methylisoxazol-3-yl)methyl)piperazin-1-yl)-3H-imidazo[4,5-*b*]pyridin-2-yl)benzyl)morpholine (20e)**

To a mixture of 5-chloro-4-(4-((5-methylisoxazol-3-yl)methyl)piperazin-1-yl)-3-nitropyridin-2-amine (0.043 g, 0.12 mmol) and EtOH (5.0 mL) was added 3-(morpholinomethyl)benzaldehyde (0.031 g, 0.15 mmol) followed by a freshly prepared aqueous solution of Na<sub>2</sub>S<sub>2</sub>O<sub>4</sub> (1M; 0.46 mL, 0.46 mmol). The reaction mixture was stirred at 80 °C for 20 h, then allowed to cool to room temperature and concentrated *in vacuo*. The residue was absorbed on silica gel, and placed on a 10 g isolate silica column. Elution with a gradient of methanol (0 to 6%) in ethyl acetate / dichloromethane (v:v; 1:1) afforded the title compound as a yellow solid after trituration with diethyl ether (0.003 g, 5%). <sup>1</sup>H-NMR (500 MHz, DMSO-*d*<sub>6</sub>) 2.40 (br s, 7H, piperazine or morpholine C-H and isoxazole 5-CH<sub>3</sub>), 2.63 (br s, 4H, piperazine or morpholine C-H), 3.56 (s, 2H, C<sub>6</sub>H<sub>4</sub>-CH<sub>2</sub>-morpholine), 3.60 (m, 6H, piperazine or morpholine C-H and N-CH<sub>2</sub>-isoxazole), 3.70 (br s, 4H, piperazine or morpholine C-H), 6.25 (s, 1H, 4-H isoxazole), 7.45 (d, J = 7.3 Hz, 1H, PhH), 7.49 (t, J = 7.3 Hz, PhH), 8.06 (d, J = 7.3 Hz, 1H, PhH), 8.11 (s, 1H) and 8.13 (s, 1H) (PhH and imidazo[4,5-*b*]pyridine 5-H), 13.51 (br s, 1H, imidazo[4,5-*b*]pyridine N-H); LC - MS (ESI, *m/z*): Rt = 1.59 min – 508, 510 [(M+H)<sup>+</sup>, Cl isotopic pattern]; HRMS: Found: 508.2226, calculated for C<sub>26</sub>H<sub>31</sub>ClN<sub>7</sub>O<sub>2</sub> (M+H)<sup>+</sup>: 508.2222.

**6-Chloro-2-(3-dimethylaminomethyl)phenyl-7-(4-(5-methylisoxazol-3-ylmethyl)piperazin-1-yl)-imidazo[4,5-*b*]pyridine (20d)**

To 3-bromomethylbenzaldehyde (124 mg, 0.62 mmol) was added a 2M solution of dimethylamine in THF (1.5 mL, 3.0 mmol). The reaction was stirred at 20 °C for 1.75 h. The reaction was added to water (10 mL) and the product extracted with ethyl acetate (3 x 5 mL). The combined extracts were washed with brine, dried (Na<sub>2</sub>SO<sub>4</sub>) and evaporated to leave 3-dimethylaminomethylbenzaldehyde (105 mg). <sup>1</sup>H-NMR (CDCl<sub>3</sub>, 500MHz): 2.27 (s, 6H, Me), 3.51 (s, 2H, CH<sub>2</sub>), 7.50 (t, J=7.6 Hz, 1H, aryl CH), 7.61 (d, J=7.6 Hz, 1H, aryl CH), 7.79 (d, J=7.6 Hz, 1H, aryl CH), 7.84 (s, 1H, aryl CH), 10.04 (s, 1H, CHO). To a mixture of 3-dimethylaminomethylbenzaldehyde (34 mg, 0.21 mmol) and 2-amino-5-chloro-4-(4-(5-methylisoxazol-3-yl)methylpiperazin-1-yl)-3-nitropyridine (70.5 mg, 0.20 mmol) in ethanol (1.5 mL) was added freshly prepared 1M sodium dithionite solution (0.7 mL, 0.7 mmol). The reaction was stirred and heated at 75 °C for 40 h. The reaction was cooled and 5M ammonia solution (0.4 mL) was added and stirred for 15 min. The solid product was filtered off, washed with water (2x2 mL) and dried in vacuum over sodium hydroxide (62 mg, 66%). <sup>1</sup>H-NMR (500 MHz, DMSO-d<sub>6</sub>) 2.20 (s, 6H, NMe<sub>2</sub>), 2.40 (s, 3H, Me), 2.64 (m, 4H, piperazine CH<sub>2</sub>), 3.49 (s, 2H, CH<sub>2</sub>), 3.60 (s, 2H, CH<sub>2</sub>), 3.70 (m, 4H, piperazine CH<sub>2</sub>), 6.25 (s, 1H, isoxazole CH), 7.42 (d, J = 7.2 Hz, 1H, aryl-H), 7.50 (t, J = 7.7 Hz, 1H, aryl-H), 8.07 (d, J=6.9 Hz, 1H, aryl-H), 8.12 (s, 2H, aryl-H and heteroaryl-H), 13.48 (br s, 1H, NH); LC - MS (ESI, *m/z*): Rt = 1.49 min – 466, 468 [(M+H)<sup>+</sup>, Cl isotopic pattern]; HRMS: Found: 466.2103, calculated for C<sub>24</sub>H<sub>29</sub>ClN<sub>7</sub>O (M+H)<sup>+</sup>: 466.2117; HPLC: Rt = 3.15 min; 92%, λ = 309 nm.

**3-((4-(6-Chloro-2-(1-methyl-1*H*-imidazol-2-yl)-3*H*-imidazo[4,5-*b*]pyridin-7-yl)piperazin-1-yl)methyl)-5-methylisoxazole (21b)**

To a mixture of 5-chloro-4-(4-((5-methylisoxazol-3-yl)methyl)piperazin-1-yl)-3-nitropyridin-2-amine (0.06 g, 0.17 mmol) and EtOH (10 mL) was added 1-methyl-1*H*-imidazole-2-carbaldehyde (0.022 g, 0.20 mmol) followed by a freshly prepared aqueous solution of Na<sub>2</sub>S<sub>2</sub>O<sub>4</sub> (1M; 0.5 mL, 0.5 mmol). The reaction mixture was heated at reflux for 24 h, then allowed to cool to room temperature and concentrated *in vacuo*. The residue was taken up in chloroform and 10% aqueous sodium bicarbonate. The aqueous layer was further extracted with dichloromethane and the combined organic solutions dried and concentrated *in vacuo*. The crude product was purified by silica column chromatography eluting with 1 to 5% methanol in dichloromethane. The pure fractions provided 50 mg of product (71%). <sup>1</sup>H-NMR (500 MHz, DMSO-*d*<sub>6</sub>) 2.39 (s, 3 H, isoxazole 5-CH<sub>3</sub>), 2.63 (br s, 4H, piperazine NCH<sub>2</sub>), 3.59 (s, 2H, N-CH<sub>2</sub>-isoxazole), 3.71 (br s, 4H, piperazine NCH<sub>2</sub>), 4.13 (s, 3H, NCH<sub>3</sub>), 6.23 (s, 1H, 4-H isoxazole), 7.13 (s, 1H, CH-imidazole), 7.43 (s, 1H, CH-imidazole), 8.10 (s, 1H, imidazo[4,5-*b*]pyridine 5-H), 13.30 (br s, 1H, imidazo[4,5-*b*]pyridine N-H); LC-MS (ESI, *m/z*): Rt = 2.11 min- 413, 415 [(M+H)<sup>+</sup>, Cl isotopic pattern]; HRMS: Found: 413.1596, calculated for C<sub>19</sub>H<sub>22</sub>ClN<sub>8</sub>O (M+H)<sup>+</sup>: 413.1599.

**3-((4-(6-Chloro-2-(furan-3-yl)-3*H*-imidazo[4,5-*b*]pyridin-7-yl)piperazin-1-yl)methyl)-5-methylisoxazole (21c)**

To a mixture of 5-chloro-4-(4-((5-methylisoxazol-3-yl)methyl)piperazin-1-yl)-3-nitropyridin-2-amine (0.058 g, 0.164 mmol) and EtOH (10 mL) was added furan-3-carbaldehyde (0.019 g, 0.2 mmol) followed by a freshly prepared aqueous solution of Na<sub>2</sub>S<sub>2</sub>O<sub>4</sub> (1M; 0.45 mL, 0.45

mmol). The reaction mixture was heated at reflux for 24 h, then allowed to cool to room temperature and concentrated *in vacuo*. The residue was taken up in chloroform and 10% aqueous sodium bicarbonate. The aqueous layer was further extracted with dichloromethane and the combined organic solutions dried and concentrated *in vacuo*. The crude product was purified by silica column chromatography eluting with 1 to 3% methanol in dichloromethane. The pure fractions provided 45 mg of product (69%). <sup>1</sup>H-NMR (500 MHz, DMSO-d<sub>6</sub>) 2.40 (s, 3H, isoxazole 5-CH<sub>3</sub>), 2.61 (br s, 4 H, piperazine NCH<sub>2</sub>), 3.59 (s, 2H, N-CH<sub>2</sub>-isoxazole), 3.65 (br s, 4H, piperazine NCH<sub>2</sub>), 6.24 (s, 1H, 4-H isoxazole), 7.06 (s, 1H, furan-H), 7.85 (s, 1H, furan-H), 8.09 (s, 1H, imidazo[4,5-*b*]pyridine 5-H), 8.37 (s, 1 H furan-H), 13.30 (br s, 1H, imidazo[4,5-*b*]pyridine N-H); LC - MS (ESI, *m/z*): Rt = 1.82 min – 399, 401 [(M+H)<sup>+</sup>, Cl isotopic pattern]; HRMS: Found: 399.1334, calculated for C<sub>19</sub>H<sub>20</sub>ClN<sub>6</sub>O<sub>2</sub> (M+H)<sup>+</sup>: 399.1331.

**3-((4-(6-Bromo-2-(2,5-dimethyloxazol-4-yl)-3H-imidazo[4,5-*b*]pyridin-7-yl)piperazin-1-yl)methyl)-5-methylisoxazole (21d)**

To a mixture of 5-bromo-4-(4-((5-methylisoxazol-3-yl)methyl)piperazin-1-yl)-3-nitropyridin-2-amine (0.1 g, 0.25 mmol) and EtOH (15 mL) was added 2,5-dimethyloxazole-4-carbaldehyde (30 mg, 0.32 mmol) followed by a freshly prepared aqueous solution of Na<sub>2</sub>S<sub>2</sub>O<sub>4</sub> (1M; 1.0 mL, 1.0 mmol). The reaction mixture was heated at reflux for 24 h, then allowed to cool to room temperature and concentrated *in vacuo*. The residue was taken up in chloroform and 10% aqueous sodium bicarbonate. The aqueous layer was further extracted with dichloromethane and the combined organic solutions dried and concentrated. Ether was added to the residue and a pale white powder precipitated; this was filtered and dried (45 mg). The product was purified on a SCX ion-exchange column to provide the title compound



as an off-white powder after trituration with ether (30 mg, 25%). <sup>1</sup>H-NMR (500 MHz, DMSO-d<sub>6</sub>) 2.39 (s, 3H, isoxazole 5-CH<sub>3</sub>), 2.47 (s, 3H, oxazole-CH<sub>3</sub>), 2.62 (br s, 4H, piperazine NCH<sub>2</sub>), 2.72 (s, 3H, oxazole-CH<sub>3</sub>), 3.59 (s, 2H, N-CH<sub>2</sub>-isoxazole), 3.63 (br s, 4H, piperazine NCH<sub>2</sub>), 6.23 (s, 1H, 4-H isoxazole), 8.18 (s, 1H, imidazo[4,5-*b*]pyridine 5-H), 13.50 (br s, 1H, imidazo[4,5-*b*]pyridine N-H); LC - MS (ESI, *m/z*): Rt = 2.09 min- 472, 474 [(M+H)<sup>+</sup>, Br isotopic pattern]; HRMS: Found: 472.1089, calculated for C<sub>20</sub>H<sub>23</sub>BrN<sub>7</sub>O<sub>2</sub> (M+H)<sup>+</sup>: 472.1091.

**3-((4-(6-Chloro-2-(5-methylisoxazol-3-yl)-3H-imidazo[4,5-*b*]pyridin-7-yl)piperazin-1-yl)methyl)-5-methylisoxazole (21e)**

To a mixture of 5-chloro-4-(4-((5-methylisoxazol-3-yl)methyl)piperazin-1-yl)-3-nitropyridin-2-amine (0.055 g, 0.156 mmol) and EtOH (10 mL) was added 5-methylisoxazole-3-carbaldehyde (0.02 g, 0.18 mmol) followed by a freshly prepared aqueous solution of Na<sub>2</sub>S<sub>2</sub>O<sub>4</sub> (1M; 0.5 mL, 0.5 mmol). The reaction mixture was heated at reflux for 24 h, then allowed to cool to room temperature and concentrated *in vacuo*. The residue was taken up in chloroform and 10% aqueous sodium bicarbonate *in vacuo*. The aqueous layer was further extracted with dichloromethane and the combined organic solutions dried and concentrated. The crude product was purified by silica column chromatography eluting with 1 to 5% methanol in dichloromethane. The pure fractions provided 34 mg of product (53%). <sup>1</sup>H-NMR (500 MHz, DMSO-d<sub>6</sub>) 2.40 (s, 3H, isoxazole 5-CH<sub>3</sub>), 2.52 (s, 3H, isoxazole-CH<sub>3</sub>), 2.62 (br s, 4H, piperazine NCH<sub>2</sub>), 3.59 (s, 2H, N-CH<sub>2</sub>-isoxazole), 3.70 (br s, 4H, piperazine NCH<sub>2</sub>), 6.24 (s, 1H, 4-H isoxazole), 6.82 (s, 1H, 4-H isoxazole), 8.18 (s, 1H, imidazo[4,5-*b*]pyridine 5-H), 13.80 (br s, 1H, imidazo[4,5-*b*]pyridine N-H); LC - MS (ESI, *m/z*): Rt =

1.85 min – 414, 416 [(M+H)<sup>+</sup>, Cl isotopic pattern]; HRMS: Found: 414.1435, calculated for C<sub>19</sub>H<sub>21</sub>ClN<sub>7</sub>O<sub>2</sub> (M+H)<sup>+</sup>: 414.1440.

**3-((4-(6-Chloro-2-(1-methyl-1H-pyrazol-3-yl)-3H-imidazo[4,5-b]pyridin-7-yl)piperazin-1-yl)methyl)-5-methylisoxazole (21g)**

To 5-chloro-4-(4-((5-methylisoxazol-3-yl)methyl)piperazin-1-yl)-3-nitropyridin-2-amine (48.8 mg, 0.138 mmol) and 1-methylpyrazole-3-aldehyde (17.5 mg, 0.159 mmol) in ethanol (1.1 mL) was added freshly prepared 1 M aqueous sodium dithionite solution (0.55 mL, 0.55 mmol). The reaction was stirred and heated at 75 °C for 22 h. The reaction was cooled and 5 M ammonia solution (0.28 mL, 1.4 mmol) was added. The resulting solid was filtered off and washed with water (2 x 2 mL), then dried *in vacuo* over sodium hydroxide to give the title compound (42 mg, 73%). <sup>1</sup>H-NMR (500 MHz, DMSO-d<sub>6</sub>) 2.40 (s, 3H, isoxazole 5-CH<sub>3</sub>), 2.61 (m, 4H, piperazine CH<sub>2</sub>), 3.59 (s, 2H, N-CH<sub>2</sub>-isoxazole), 3.65 (m, 4H, piperazine CH<sub>2</sub>), 3.96 (s, 3H, NCH<sub>3</sub>), 6.24 (s, 1H, isoxazole 4-H), 6.86 (d, J = 2.2 Hz, 1H, pyrazole H), 7.85 (d, J = 1.9 Hz, 1H, pyrazole H), 8.08 (s, 1H, hetaryl H), 13.32 (s, 1H, N-H); LC - MS (ESI, *m/z*): Rt = 1.66 min – 413, 415 [(M+H)<sup>+</sup>, Cl isotopic pattern]; HRMS: Found: 413.1589, calculated for C<sub>19</sub>H<sub>22</sub>ClN<sub>8</sub>O (M+H)<sup>+</sup>: 413.1600; HPLC: Rt = 4.33 min; 94%, λ = 310 nm.

**3-((4-(6-Bromo-2-(1,2,3-thiadiazol-4-yl)-3H-imidazo[4,5-b]pyridin-7-yl)piperazin-1-yl)methyl)-5-methylisoxazole (21f)**

To a mixture of 5-bromo-4-(4-((5-methylisoxazol-3-yl)methyl)piperazin-1-yl)-3-nitropyridin-2-amine (0.052 g, 0.131 mmol) and EtOH (10 mL) was added 1,2,3-thiadiazole-4-carbaldehyde (0.018g, 0.16 mmol) followed by a freshly prepared aqueous solution of

Na<sub>2</sub>S<sub>2</sub>O<sub>4</sub> (1M; 0.4 mL, 0.4 mmol). The reaction mixture was heated at reflux for 24 h, then allowed to cool to room temperature and concentrated *in vacuo*. The residue was taken up in chloroform and 10% aqueous sodium bicarbonate. The aqueous layer was further extracted with dichloromethane and the combined organic solutions dried and concentrated *in vacuo*. The crude product was purified on a silica column eluting with 1 to 5% methanol in dichloromethane. The pure fractions provided 30 mg of product (50%). <sup>1</sup>H-NMR (500 MHz, DMSO-d<sub>6</sub>) 2.40 (s, 3H, isoxazole 5-CH<sub>3</sub>), 2.64 (br s, 4H, piperazine NCH<sub>2</sub>), 3.60 (s, 2H, N-CH<sub>2</sub>-isoxazole), 3.68 (br s, 4H, piperazine NCH<sub>2</sub>), 6.24 (s, 1H, 4-H isoxazole), 8.32 (s, 1H, imidazo[4,5-*b*]pyridine 5-H), 9.78 (s, 1H, CH of thiadiazole), 14.00 (br s, 1H, imidazo[4,5-*b*]pyridine N-H); LC - MS (ESI, *m/z*): Rt = 1.70 min – 461, 463 [(M+H)<sup>+</sup>, Br isotopic pattern]; HRMS: Found: 461.0497, calculated for C<sub>17</sub>H<sub>18</sub>BrN<sub>8</sub>OS (M+H)<sup>+</sup>: 461.0502.

**3-((4-(6-Chloro-2-(1-methyl-1*H*-pyrazol-5-yl)-3*H*-imidazo[4,5-*b*]pyridin-7-yl)piperazin-1-yl)methyl)-5-methylisoxazole (21h)**

To a solution of 5-chloro-4-(4-((5-methylisoxazol-3-yl)methyl)piperazin-1-yl)-3-nitropyridin-2-amine (75.0 mg, 0.212 mmol) and 1-methyl-1*H*-pyrazole-5-carbaldehyde (50.0 mg, 0.454 mmol) in EtOH (5.0 mL) was added 1M Na<sub>2</sub>S<sub>2</sub>O<sub>4</sub> (0.848 mL, 0.848 mmol, freshly prepared aqueous solution) and the reaction mixture was heated to 80 °C and stirred for 15 h whilst being open to air. Once cooled, the reaction was evaporated *in vacuo* and the residue dry loaded onto silica. Purification was accomplished by flash chromatography on silica gel (3 x 12) eluting with MeOH/CH<sub>2</sub>Cl<sub>2</sub> (5%) to yield the title compound (15 mg, 17%) as a pale yellow solid. <sup>1</sup>H-NMR (500 MHz, CDCl<sub>3</sub>) 2.43 (d, *J* = 0.4 Hz, 3H, CH<sub>3</sub>), 2.76 (app t, *J* = 4.2 Hz, 4H, CH<sub>2</sub>), 3.67 (s, 2H, CH<sub>2</sub>), 3.90 (app s, 4H, CH<sub>2</sub>), 4.39 (s, 3H, -NCH<sub>3</sub>), 6.07 (s, 1H, CH<sub>ar</sub>), 6.83 (d, *J* = 1.9 Hz, 1H, CH<sub>ar</sub>), 7.62 (d, *J* = 1.9 Hz, 1H, CH<sub>ar</sub>), 8.16 (br s, 1H, CH<sub>ar</sub>),

13.25 (s, 1H, NH); LC - MS (ESI, *m/z*): Rt = 1.82 min – 413, 415 [(M + H)<sup>+</sup>, Cl isotopic pattern]; HRMS: Found: 435.1417, calculated for C<sub>19</sub>H<sub>21</sub>N<sub>8</sub>OClNa (M+Na)<sup>+</sup>: 435.1419.

**3-((4-(6-Chloro-2-(1-ethyl-1*H*-pyrazol-4-yl)-3*H*-imidazo[4,5-*b*]pyridin-7-yl)piperazin-1-yl)methyl)-5-methylisoxazole (22a)**

To a solution of 5-chloro-4-(4-((5-methylisoxazol-3-yl)methyl)piperazin-1-yl)-3-nitropyridin-2-amine (80.0 mg, 0.230 mmol) and 1-ethyl-1*H*-pyrazole-4-carbaldehyde (30.0 mg, 0.240 mmol) in EtOH (5.5 mL) was added 1M aqueous Na<sub>2</sub>S<sub>2</sub>O<sub>4</sub> (0.920 mL, 0.920 mmol, freshly prepared) and the solution was heated to 80 °C and stirred for 18 h whilst being open to air. Once cooled, the reaction was evaporated *in vacuo* and the residue dry loaded onto silica. Purification was accomplished by flash chromatography on silica gel (3 x 12) eluting with MeOH/CH<sub>2</sub>Cl<sub>2</sub> (5-7.5%) to yield the title compound (78 mg, 79%) as a pale yellow solid. <sup>1</sup>H-NMR (500 MHz, CDCl<sub>3</sub>) 1.55 (t, *J* = 7.3 Hz, 3H, CH<sub>2</sub>CH<sub>3</sub>), 2.44 (s, 3H, CH<sub>3</sub>), 2.73 (app t, *J* = 4.3 Hz, 4H, CH<sub>2</sub>), 3.67 (s, 2H, CH<sub>2</sub>), 3.81 (br s, 4H, CH<sub>2</sub>), 4.23 (q, *J* = 7.3 Hz, 2H, CH<sub>2</sub>CH<sub>3</sub>), 6.09 (s, 1H, CH<sub>ar</sub>), 7.96 (br s, 3H, CH<sub>ar</sub>), 13.83 (s, 1H, NH); LC - MS (ESI, *m/z*): Rt = 1.82 min – 427, 429 [(M + H)<sup>+</sup>, Cl isotopic pattern]; HRMS: Found: 427.1759, calculated for C<sub>20</sub>H<sub>24</sub>N<sub>8</sub>OCl (M+H)<sup>+</sup>: 427.1756.

**3-((4-(6-Chloro-2-(1-isopropyl-1*H*-pyrazol-4-yl)-3*H*-imidazo[4,5-*b*]pyridin-7-yl)piperazin-1-yl)methyl)-5-methylisoxazole (22b)**

To a solution of 5-chloro-4-(4-((5-methylisoxazol-3-yl)methyl)piperazin-1-yl)-3-nitropyridin-2-amine (80.0 mg, 0.230 mmol) and 1-isopropyl-1*H*-pyrazole-4-carbaldehyde (33.2 mg, 0.240 mmol) in EtOH (5.5 mL) was added 1M aqueous Na<sub>2</sub>S<sub>2</sub>O<sub>4</sub> (0.920 mL, 0.920 mmol,

freshly prepared), and the solution was heated to 80 °C and stirred for 18 h whilst being open to air. Once cooled, the reaction was evaporated *in vacuo* and the residue dry loaded onto silica. Purification was accomplished by flash chromatography on silica gel (3 x 12) eluting with MeOH/CH<sub>2</sub>Cl<sub>2</sub> (5-7.5%) to yield the title compound (70 mg, 69%) as a pale yellow solid. <sup>1</sup>H-NMR (500 MHz, CDCl<sub>3</sub>) 1.57 (d, *J* = 6.6 Hz, 6H, CH(CH<sub>3</sub>)<sub>2</sub>), 2.43 (s, 3H, CH<sub>3</sub>), 2.73 (br s, 4H, CH<sub>2</sub>), 3.67 (s, 2H, CH<sub>2</sub>), 3.82 (br s, 4H, CH<sub>2</sub>), 4.56 (septet, *J* = 6.6 Hz, 1H, CH(CH<sub>3</sub>)<sub>2</sub>), 6.09 (s, 1H, CH<sub>ar</sub>), 8.07-7.93 (m, 3H, CH<sub>ar</sub>), 13.85 (s, 1H, NH); LC - MS (ESI, *m/z*): Rt = 1.90 min – 441, 443 [(M + H)<sup>+</sup>, Cl isotopic pattern]; HRMS: Found: 463.1732, calculated for C<sub>21</sub>H<sub>25</sub>N<sub>8</sub>OCINa (M+Na)<sup>+</sup>: 463.1732.

**3-((4-(6-Chloro-2-(1-(2,2-difluoroethyl)-1H-pyrazol-4-yl)-3H-imidazo[4,5-b]pyridin-7-yl)piperazin-1-yl)methyl)-5-methylisoxazole (22c)**

To a solution of 5-chloro-4-(4-((5-methylisoxazol-3-yl)methyl)piperazin-1-yl)-3-nitropyridin-2-amine (80.0 mg, 0.230 mmol) and 1-(2,2-difluoroethyl)-1H-pyrazole-4-carbaldehyde (38.0 mg, 0.240 mmol) in EtOH (5.5 mL) was added 1M aqueous Na<sub>2</sub>S<sub>2</sub>O<sub>4</sub> (0.920 mL, 0.920 mmol, freshly prepared) and the solution was heated to 80 °C and stirred for 18 h whilst being open to air. Once cooled, the reaction was evaporated *in vacuo* and the residue dry loaded onto silica. Purification was accomplished by flash chromatography on silica gel (3 x 12) eluting with MeOH/CH<sub>2</sub>Cl<sub>2</sub> (5-7.5%) to yield the title compound (65 mg, 61%) as a pale yellow solid. <sup>1</sup>H-NMR (500 MHz, CDCl<sub>3</sub>) 2.44 (s, 3H, CH<sub>3</sub>), 2.74 (br s, 4H, CH<sub>2</sub>), 3.68 (s, 2H, CH<sub>2</sub>), 3.82 (br s, 4H, CH<sub>2</sub>), 4.51 (td, *J* = 13.3, 3.8 Hz, 2H, CH<sub>2</sub>CHF<sub>2</sub>), 6.10 (s, 1H, CH<sub>ar</sub>), 6.15 (tt, *J* = 55.2, 3.8 Hz, 1H, CHF<sub>2</sub>), 7.89 (br s, 1H, CH<sub>ar</sub>), 8.00 (br s, 2H, CH<sub>ar</sub>), 13.91 (s, 1H, NH); LC - MS (ESI, *m/z*): Rt = 1.82 min – 463, 465 [(M + H)<sup>+</sup>, Cl isotopic pattern];

HRMS: Found: 485.1388, calculated for C<sub>20</sub>H<sub>21</sub>N<sub>8</sub>OCIF<sub>2</sub>Na (M+Na)<sup>+</sup>: 485.1387.

**3-((4-(6-Chloro-2-(3-cyclopropyl-1-methyl-1H-pyrazol-4-yl)-3H-imidazo[4,5-b]pyridin-7-yl)piperazin-1-yl)methyl)-5-methylisoxazole (22e)**

To a solution of 5-chloro-4-(4-((5-methylisoxazol-3-yl)methyl)piperazin-1-yl)-3-nitropyridin-2-amine (75.0 mg, 0.213 mmol) and 1-methyl-3-isopropyl-1H-pyrazole-4-carbaldehyde (33.6 mg, 0.224 mmol) in EtOH (5.0 mL) was added 1M aqueous Na<sub>2</sub>S<sub>2</sub>O<sub>4</sub> (0.850 mL, 0.850 mmol, freshly prepared) and the solution was heated to 80 °C and stirred for 18 h whilst being open to air. Once cooled, the reaction was evaporated *in vacuo* and the residue dry loaded onto silica. Purification was accomplished by flash chromatography on silica gel (3 x 15) eluting with MeOH/CH<sub>2</sub>Cl<sub>2</sub> (2.5-4-8%) to yield the title compound (82 mg, 85%) as a pale yellow solid. <sup>1</sup>H-NMR (500 MHz, CDCl<sub>3</sub>) 0.97-1.03 (m, 4H, CH(CH<sub>2</sub>)<sub>2</sub>), 2.43 (s, 3H, CH<sub>3</sub>), 2.53 (app qn, *J* = 5.9 Hz, 1H, CH), 2.73 (app t, *J* = 4.5 Hz, 4H, CH<sub>2</sub>), 3.66 (s, 2H, CH<sub>2</sub>), 3.82 (br s, 4H, CH<sub>2</sub>), 3.87 (s, 3H, NCH<sub>3</sub>), 6.06 (d, *J* = 0.6 Hz, 1H, CH<sub>ar</sub>), 7.78 (br s, 1H, CH<sub>ar</sub>), 8.00 (br s, 1H, CH<sub>ar</sub>), 12.23 (s, 1H, NH); LC - MS (ESI, *m/z*): Rt = 2.04 min – 453, 455 [(M + H)<sup>+</sup>, Cl isotopic pattern]; HRMS: Found: 475.1737, calculated for C<sub>22</sub>H<sub>25</sub>N<sub>8</sub>OCINa (M+Na)<sup>+</sup>: 475.1732.

**5-Chloro-4-(4-((4-methyl-1,2,5-oxadiazol-3-yl)methyl)piperazin-1-yl)-3-nitropyridin-2-amine (26a)**

To a solution of 3-methyl-4-(piperazin-1-ylmethyl)-1,2,5-oxadiazole (114 mg, 0.624 mmol) and 2-amino-3-nitro-4,5-dichloropyridine (150 mg, 0.594 mmol) in *i*PrOH (4.3 mL) was added DIPEA (466 μl, 2.67 mmol). The solution was stirred at 50 °C for 14½ hrs. On

cooling a yellow precipitate dropped out which was filtered, washed with Et<sub>2</sub>O, dried *in vacuo* to yield the title compound as a yellow solid (208 mg, 94%). The filtrate was concentrated *in vacuo* and the residue purified by flash chromatography on silica gel (2 x 10) eluting with EtOAc/hexane (30-50%) to yield the title compound (13 mg, 6%) as a yellow solid. <sup>1</sup>H-NMR (500 MHz, CDCl<sub>3</sub>) 2.45 (s, 3H, CH<sub>3</sub>), 2.66 (br s, 4H, CH<sub>2</sub>), 3.19 (app t, *J* = 4.6 Hz, 4H, CH<sub>2</sub>), 3.74 (s, 2H, CH<sub>2</sub>C), 5.81 (s, 2H, NH<sub>2</sub>), 8.02 (s, 1H, C(Cl)CH); LC (Method C) - MS (ESI, *m/z*): Rt = 2.15 min – 354, 356 [(M + H)<sup>+</sup>, Cl isotopic pattern].

**3-((4-(6-Chloro-2-(1,3-dimethyl-1*H*-pyrazol-4-yl)-3*H*-imidazo[4,5-*b*]pyridin-7-yl)piperazin-1-yl)methyl)-4-methyl-1,2,5-oxadiazole (27a)**

To a solution of 5-chloro-4-(4-((4-methyl-1,2,5-oxadiazol-3-yl)methyl)piperazin-1-yl)-3-nitropyridin-2-amine (53.0 mg, 0.150 mmol) and 1,3-dimethyl-1*H*-pyrazole-4-carbaldehyde (19.5 mg, 0.157 mmol) in EtOH (3.5 mL) was added 1M aqueous Na<sub>2</sub>S<sub>2</sub>O<sub>4</sub> (0.629 mL, 0.629 mmol, freshly prepared) and the solution was heated to 80 °C and stirred for 15 h whilst being open to air. Once cooled, the reaction was evaporated *in vacuo* and the residue dry loaded onto silica. Purification was accomplished by flash chromatography on silica gel (3 x 12) eluting with MeOH/CH<sub>2</sub>Cl<sub>2</sub> (5-7.5%) to give an off white solid (48 mg). The solid was further purified by trituration in hot EtOAc to yield the title compound (33 mg, 51%) as an off white solid and a filtrate which upon evaporation *in vacuo* gave the title compound (9 mg, 14%) as a pale yellow solid. <sup>1</sup>H-NMR (500 MHz, CDCl<sub>3</sub>) 2.49 (s, 3H, CH<sub>3</sub>), 2.61 (s, 3H, CH<sub>3</sub>), 2.72 (app t, *J* = 4.7 Hz, 4H, CH<sub>2</sub>), 3.77 (s, 2H, CH<sub>2</sub>), 3.82 (app s, 4H, CH<sub>2</sub>), 3.92 (s, 3H, NCH<sub>3</sub>), 7.83 (s, 1H, CH<sub>ar</sub>), 8.02 (s, 1H, CH<sub>ar</sub>), 11.49 (br s, 1H, NH); LC - MS (ESI, *m/z*): Rt = 2.35 min – 428, 430 [(M + H)<sup>+</sup>, Cl isotopic pattern]; HRMS: Found: 428.1712, calculated for C<sub>19</sub>H<sub>23</sub>N<sub>9</sub>OCl (M+H)<sup>+</sup>: 428.1708.

***tert*-Butyl 4-((1,2,4-oxadiazol-3-yl)methyl)piperazine-1-carboxylate (24b)**

To a solution of Boc-piperazine (571 mg, 3.07 mmol) and 3-(chloromethyl)-1,2,4-oxadiazole (400 mg, 3.37 mmol) in CH<sub>2</sub>Cl<sub>2</sub> (30 mL) was added triethylamine (1.70 mL, 12.3 mmol). The reaction was stirred for 22 h at 50 °C before being concentrated *in vacuo* to give a crude oily white solid. Purification was accomplished by flash chromatography on silica gel (4 x 12) eluting with MeOH/CH<sub>2</sub>Cl<sub>2</sub> (5%) to yield the title compound (555 mg, 67%) as a white solid. <sup>1</sup>H-NMR (500 MHz, CDCl<sub>3</sub>) 1.43 (s, 9H, C(CH<sub>3</sub>)<sub>3</sub>), 2.52 (app t, *J* = 4.9 Hz, 4H, CH<sub>2</sub>), 3.45 (app t, *J* = 4.9 Hz, 4H, CH<sub>2</sub>), 3.78 (s, 2H, CH<sub>2</sub>C), 8.71 (s, 1H, CH<sub>ar</sub>); LC - MS (ESI, *m/z*): Rt = 1.67 min - 213 (M - <sup>t</sup>Bu)<sup>+</sup>, 169 (M - Boc)<sup>+</sup>.

**4-(4-((1,2,4-Oxadiazol-3-yl)methyl)piperazin-1-yl)-5-chloro-3-nitropyridin-2-amine (26b)**

To a solution of *tert*-butyl 4-((1,2,4-oxadiazol-3-yl)methyl)piperazine-1-carboxylate (213 mg, 0.790 mmol) in CH<sub>2</sub>Cl<sub>2</sub> (18 mL) was added TFA (1.8 mL, 23.8 mmol) and the solution was stirred at room temperature for 1½ h. The reaction was concentrated *in vacuo*, azeotroping with toluene (x2) and drying in vacuum desiccator (containing KOH) overnight gave a yellow oil (**25b**). The crude oil was dissolved in <sup>i</sup>PrOH (4.4 mL) and both 2-amino-3-nitro-4,5-dichloropyridine (190 mg, 0.752 mmol) and DIPEA (520 µl, 3.00 mmol) were added. The solution was stirred at 50 °C for 4 h. On cooling a yellow precipitate formed which was filtered, washed with Et<sub>2</sub>O, dried *in vacuo* to yield the title compound as a yellow solid (165 mg, 65%). The filtrate was concentrated *in vacuo* to give 715 mg of an oily yellow solid. Purification was accomplished by flash chromatography on silica gel (4 x 11) eluting with



EtOAc/hexane (40-50%) to yield the title compound (42 mg, 16%) as a yellow solid. <sup>1</sup>H-NMR (500 MHz, CDCl<sub>3</sub>) 2.74 (app t, *J* = 4.1 Hz, 4H, -CH<sub>2</sub>-), 3.25 (t, *J* = 4.8 Hz, 4H, -CH<sub>2</sub>-), 3.85 (s, 2H, -CH<sub>2</sub>C-), 5.77 (s, 2H, NH<sub>2</sub>), 7.99 (s, 1H, CH<sub>ar</sub>), 8.72 (s, 1H, -C(Cl)CH-); LC - MS (ESI, *m/z*): Rt = 1.56 min – 340, 342 [(M + H)<sup>+</sup>, Cl isotopic pattern];

**3-((4-(6-Chloro-2-(1,3-dimethyl-1*H*-pyrazol-4-yl)-3*H*-imidazo[4,5-*b*]pyridin-7-yl)piperazin-1-yl)methyl)-1,2,4-oxadiazole (27b)**

To a solution of 4-(4-((1,2,4-oxadiazol-3-yl)methyl)piperazin-1-yl)-5-chloro-3-nitropyridin-2-amine (50.0 mg, 0.147 mmol) and 1,3-dimethyl-1*H*-pyrazole-4-carbaldehyde (19.2 mg, 0.155 mmol) in EtOH (3.4 mL) was added 1M Na<sub>2</sub>S<sub>2</sub>O<sub>4</sub> (0.588 mL, 0.588 mmol, freshly prepared) and the solution was heated to 80 °C and stirred for 15 h whilst being open to air. Once cooled, the reaction was evaporated *in vacuo* and the residue dry loaded onto silica. Purification was accomplished by flash chromatography on silica gel (2 x 14) eluting with MeOH/CH<sub>2</sub>Cl<sub>2</sub> (5-7.5%) to yield the title compound (26 mg, 43%) as a pale yellow solid. <sup>1</sup>H-NMR (500 MHz, CDCl<sub>3</sub>) 2.58 (s, 3H, CH<sub>3</sub>), 2.81 (app t, *J* = 4.4 Hz, 4H, CH<sub>2</sub>), 3.82 (app s, 4H, CH<sub>2</sub>), 3.85 (s, 3H, NCH<sub>3</sub>), 3.88 (s, 2H, CH<sub>2</sub>), 7.62 (br s, 1H, CH<sub>ar</sub>), 7.87 (br s, 1H, CH<sub>ar</sub>), 8.74 (s, 1H, CH<sub>ar</sub>), 13.04 (s, 1H, NH); LC - MS (ESI, *m/z*): Rt = 1.91 min – 414, 416 [(M + H)<sup>+</sup>, Cl isotopic pattern]; HRMS: Found: 436.1374, calculated for C<sub>18</sub>H<sub>20</sub>N<sub>9</sub>OCINa (M+Na)<sup>+</sup>: 436.1372.

**2-Amino-5-chloro-4-(4-(5-methyl-1,2,4-oxadiazol-3-yl)methylpiperazin-1-yl)-3-nitropyridine (26c)**

1-[(5-Methyl-1,2,4-oxadiazol-3-yl)methyl]piperazine hydrochloride (217 mg, 0.99 mmol) and 2-amino-4,5-dichloro-3-nitropyridine (208 mg, 1.0 mmol) were stirred in 2-propanol (5 mL) and diisopropylethylamine (523  $\mu$ L, 387 mg, 3.0 mmol) was added. The mixture was stirred and heated at 45 °C for 23 h. The reaction was cooled and the product filtered off and washed with 2-propanol. Drying in vacuum gave the product (246 mg, 69%). <sup>1</sup>H-NMR (500 MHz, CDCl<sub>3</sub>) 2.63 (s, 3H, CH<sub>3</sub>), 2.77 (br m, 4H, piperazine C-H), 3.29 (m, 4H, piperazine C-H), 3.76 (s, 2H, CH<sub>2</sub>), 5.27 (s, 2H, NH<sub>2</sub>), 8.02 (s, 1H, pyridine 6-H); LC - MS (ESI, *m/z*): Rt = 1.66 min – 354 (M + H)<sup>+</sup>, <sup>35</sup>Cl isotope.

**3-((4-(6-Chloro-2-(1,3-dimethyl-1*H*-pyrazol-4-yl)-3*H*-imidazo[4,5-*b*]pyridin-7-yl)piperazin-1-yl)methyl)-5-methyl-1,2,4-oxadiazole (27c)**

To a solution of 5-chloro-4-(4-((5-methyl-1,2,4-oxadiazol-3-yl)methyl)piperazin-1-yl)-3-nitropyridin-2-amine (60.0 mg, 0.170 mmol) and 1,3-dimethyl-1*H*-pyrazole-4-carbaldehyde (22.2 mg, 0.179 mmol) in EtOH (3.8 mL) was added 1M aqueous Na<sub>2</sub>S<sub>2</sub>O<sub>4</sub> (0.678 mL, 0.678 mmol, freshly prepared) and the solution was heated to 80 °C and stirred for 16 h whilst being open to air. Once cooled, the reaction was evaporated *in vacuo* and the residue dry loaded onto silica. Purification was accomplished by flash chromatography on silica gel (3 x 14) eluting with MeOH/CH<sub>2</sub>Cl<sub>2</sub> (5-7.5%) to yield the title compound as a pale yellow solid. Recrystallisation in EtOAc/Et<sub>2</sub>O gave the title compound (20 mg, 27%) as an off white solid. The filtrate was concentrated *in vacuo*, to yield an additional amount of title compound (12 mg, 16%) as a pale yellow solid. <sup>1</sup>H-NMR (500 MHz, CDCl<sub>3</sub>) 2.60 (s, 3H, CH<sub>3</sub>), 2.62 (s, 3H, CH<sub>3</sub>), 2.81 (app t, *J* = 4.5 Hz, 4H, CH<sub>2</sub>), 3.76 (s, 2H, CH<sub>2</sub>), 3.87 (app s, 4H, CH<sub>2</sub>), 3.90 (s, 3H, NCH<sub>3</sub>), 7.77 (br s, 1H, CH<sub>ar</sub>), 7.96 (br s, 1H, CH<sub>ar</sub>), 12.18 (s, 1H, NH); LC - MS (ESI,

*m/z*): Rt = 1.95 min – 428, 430 [(M + H)<sup>+</sup>, Cl isotopic pattern]; HRMS: Found: 450.1527, calculated for C<sub>19</sub>H<sub>22</sub>N<sub>9</sub>OCINa (M+Na)<sup>+</sup>: 450.1528; HPLC: Rt = 5.90 min: 94%, λ = 309 nm.

***tert*-Butyl 4-((1-methyl-1*H*-1,2,4-triazol-3-yl)methyl)piperazine-1-carboxylate (24d)**

To a solution of Boc-piperazine (217 mg, 1.16 mmol) and 3-(chloromethyl)-1-methyl-1*H*-1,2,4-triazole HCl salt (200 mg, 1.19 mmol) in CH<sub>2</sub>Cl<sub>2</sub> (8 mL) was added triethylamine (0.45 mL, 3.24 mmol). The reaction mixture was stirred at room temperature for 20 h and then at 50 °C for 18 h before being concentrated *in vacuo*. Purification of the crude product was accomplished by flash chromatography on silica gel to yield the title compound (290 mg, 89%). <sup>1</sup>H-NMR (500 MHz, CDCl<sub>3</sub>) 1.45 (s, 9H, C(CH<sub>3</sub>)<sub>3</sub>), 2.44 (br s, 4H, piperazine N-CH), 3.42 (br t, J = 4.6 Hz, 4H, piperazine N-CH), 3.70 (s, 2H, NCH<sub>2</sub>-triazole), 3.94 (s, 3H, N-CH<sub>3</sub>), 7.80 (s, 1H, triazole C-H); LC - MS (ESI, *m/z*): Rt = 1.56 min (absorbs weakly) – 304 (M+Na)<sup>+</sup>.

**5-Chloro-4-(4-((1-methyl-1*H*-1,2,4-triazol-3-yl)methyl)piperazin-1-yl)-3-nitropyridin-2-amine (26d)**

To a solution of *tert*-butyl 4-((1-methyl-1*H*-1,2,4-triazol-3-yl)methyl)piperazine-1-carboxylate (142 mg, 0.51 mmol) in CH<sub>2</sub>Cl<sub>2</sub> (30 mL) was added TFA (3.0 mL) and the solution was stirred at room temperature for 16 h. The reaction was concentrated *in vacuo* to give a yellow oil (**25d**). The crude oil was dissolved in *i*PrOH (6.3 mL) and both 2-amino-3-nitro-4,5-dichloropyridine (100 mg, 0.48 mmol) and DIPEA (377 μl, 2.16 mmol) were added, and the reaction mixture was stirred at 50 °C for 4½ hr. On cooling a yellow precipitate

formed which was filtered, washed with ice cold  $i$ PrOH then  $\text{Et}_2\text{O}$ , dried *in vacuo* to yield the title compound as a yellow solid (142 mg, 84%).  $^1\text{H-NMR}$  (500 MHz,  $\text{CDCl}_3$ ) 2.66 (app t,  $J = 4.7$  Hz, 4H,  $\text{CH}_2$ ), 3.21 (app t,  $J = 4.7$  Hz, 4H,  $\text{CH}_2$ ), 3.78 (s, 2H,  $\text{CH}_2\text{C}$ ), 3.98 (s, 3H,  $\text{CH}_3$ ), 5.80 (s, 2H,  $\text{NH}_2$ ), 7.81 (s, 1H,  $\text{CH}_{\text{ar}}$ ), 8.03 (s, 1H,  $\text{C}(\text{Cl})\text{CH}$ ); LC - MS (ESI,  $m/z$ ):  $R_t = 1.50$  min – 353, 355  $[(\text{M} + \text{H})^+]$ , Cl isotopic pattern].

**6-Chloro-2-(1,3-dimethyl-1H-pyrazol-4-yl)-7-(4-((1-methyl-1H-1,2,4-triazol-3-yl)methyl)piperazin-1-yl)-3H-imidazo[4,5-b]pyridine (27d)**

To a solution of 5-chloro-4-(4-((1-methyl-1H-1,2,4-triazol-3-yl)methyl)piperazin-1-yl)-3-nitropyridin-2-amine (45 mg, 0.128 mmol) and 1,3-dimethyl-1H-pyrazole-4-carbaldehyde (16.6 mg, 0.134 mmol) in EtOH (2.97 mL) was added 1M  $\text{Na}_2\text{S}_2\text{O}_4$  (0.589 mL, 0.589 mmol, freshly prepared) and the solution heated to 80 °C, whilst being open to air. After 22 h an additional 4 eq. of 1M aqueous  $\text{Na}_2\text{S}_2\text{O}_4$  (0.589 mL, 0.589 mmol, freshly prepared) was added and the reaction heated for a further 67 h. Once cooled, the reaction was evaporated *in vacuo* and the residue dry loaded onto silica. Purification was accomplished by flash chromatography on silica gel (3 x 16) eluting with MeOH/ $\text{CH}_2\text{Cl}_2$  (5-10%) to yield the title compound (23 mg, 42 % yield) as a pale yellow film.  $^1\text{H-NMR}$  (500 MHz,  $\text{CDCl}_3$ ) 2.59 (s, 3H,  $\text{CH}_3$ ), 2.68 (app s, 4H,  $\text{CH}_2$ ), 3.75 (app s, 4H,  $\text{CH}_2$ ), 3.78 (s, 2H,  $\text{CH}_2$ ), 3.83 (br s, 3H,  $\text{NCH}_3$ ), 4.01 (s, 3H,  $\text{NCH}_3$ ), 7.60 (br s, 1H,  $\text{CH}_{\text{ar}}$ ), 7.84 (s, 1H,  $\text{CHCl}$ ), 7.87 (br s, 1H,  $\text{CH}_{\text{ar}}$ ), 13.29 (s, 1H,  $\text{NH}$ ); LC - MS (ESI,  $m/z$ ):  $R_t = 1.79$  min – 427, 429  $[(\text{M} + \text{H})^+]$ , Cl isotopic pattern]; HRMS: Found: 427.1871, calculated for  $\text{C}_{19}\text{H}_{24}\text{N}_{10}\text{Cl}$   $(\text{M} + \text{H})^+$ : 427.1868; HPLC:  $R_t = 5.27$  min; 92%,  $\lambda = 309$  nm.

***tert*-Butyl 4-(pyrimidin-5-ylmethyl)piperazine-1-carboxylate (24f)**

To a solution of 1-Boc-piperazine (0.45 g, 2.40 mmol) in anhydrous dichloromethane (25 mL) was added 5-formylpyrimidine (0.260 g, 2.40 mmol) followed by sodium triacetoxyborohydride (0.600g, 2.76 mmol) and acetic acid (0.144 g, 2.40 mmol). The reaction mixture was stirred at room temperature for 6 h, and then diluted with chloroform (25 mL), washed with a 10% aqueous NaHCO<sub>3</sub> solution (2 x 40 mL), and brine (20 mL). The organic layer was dried (MgSO<sub>4</sub>), and concentrated *in vacuo*. The title compound was obtained as a white solid (0.611 g, 92%). <sup>1</sup>H-NMR (500 MHz, DMSO-d<sub>6</sub>) 1.38 (s, 9H, CO<sub>2</sub>(CH<sub>3</sub>)<sub>3</sub>), 2.32 (t, J = 5.0 Hz, 4H, piperazine N-CH), 3.30 (br s, 4H, piperazine N-CH), 3.53 (s, 2H, NCH<sub>2</sub>-pyrimidine), 8.72 (s, 2H, pyrimidine 4-H and pyrimidine 6-H) 9.09 (s, 1H, pyrimidine 2-H); LC - MS (ESI, *m/z*): Rt = 1.24 min – 223 (M-<sup>t</sup>Bu)<sup>+</sup>, 179 (M-BOC)<sup>+</sup>.

**5-Chloro-3-nitro-4-(4-(pyrimidin-5-ylmethyl)piperazin-1-yl)pyridin-2-amine (26f)**

A solution of *tert*-butyl 4-(pyrimidin-5-ylmethyl)piperazine-1-carboxylate (0.567 g, 2.03 mmol) in TFA (12 mL) and dichloromethane (17 mL) was stirred at room temperature for 2 h and 15 min. The solvents were then removed under reduced pressure and azeotroped with toluene. The resultant residue (**25f**) was dissolved in isopropanol (34 mL), and to this solution 4,5-dichloro-3-nitropyridin-2-amine (0.395 g, 1.90 mmol) was added followed by diisopropylethylamine (1.77 mL, 10.15 mmol). The reaction mixture was stirred at 45 °C for 18 h, it was then allowed to cool to room temperature and diluted with isopropanol (20 mL). The yellow precipitate was collected by filtration, washed with isopropanol, diethyl ether, and dried (0.380 g, 54%). <sup>1</sup>H-NMR (500 MHz, DMSO-d<sub>6</sub>) 2.50 (br s, obscured by solvent peak, piperazine N-CH), 3.06 (br s, 4H, piperazine N-CH), 3.59 (s, 2H, NCH<sub>2</sub>-pyrimidine),

7.00 (s, 2H, NH<sub>2</sub>), 8.07 (s, 1H, pyridine 6-H), 8.75 (s, 2H, pyrimidine 4-H and pyrimidine 6-H) 9.10 (s, 1H, pyrimidine 2-H); LC - MS (ESI, *m/z*): Rt = 1.16 min – 350, 352 [(M+H)<sup>+</sup>, Cl isotopic pattern].

**6-Chloro-2-(1,3-dimethyl-1*H*-pyrazol-4-yl)-7-(4-(pyrimidin-5-ylmethyl)piperazin-1-yl)-3*H*-imidazo[4,5-*b*]pyridine (27f)**

To a mixture of 5-chloro-3-nitro-4-(4-(pyrimidin-5-ylmethyl)piperazin-1-yl)pyridin-2-amine (0.070 g, 0.20 mmol) and EtOH (3.5 mL) was added 1,3-dimethyl-1*H*-pyrazole-4-carbaldehyde (0.027 g, 0.22 mmol) followed by a freshly prepared aqueous solution of Na<sub>2</sub>S<sub>2</sub>O<sub>4</sub> (1M; 0.80 mL, 0.80 mmol). The reaction mixture was stirred at 80 °C for 18 h, it was then allowed to cool to room temperature, and concentrated *in vacuo*. The resultant residue was absorbed on silica gel, placed on a 10 g isolute silica column which was first eluted with ethyl acetate / dichloromethane (v:v; 1:1), and then 4%, 6%, and 10% methanol in ethyl acetate. The product obtained was triturated with diethyl ether, the yellow precipitate was collected by filtration, and it was successively washed with diethyl ether (2 x 5 mL), water (4 x 3 mL), diethyl ether (3 x 4 mL), then dried *in vacuo* over P<sub>2</sub>O<sub>5</sub> (0.013 g, 15%).  
<sup>1</sup>H-NMR (500 MHz, DMSO-*d*<sub>6</sub>) 2.51 (s, obscured by solvent peak, 3H, pyrazole 3-CH<sub>3</sub>), 2.61 (br s, 4H, piperazine N-CH), 3.62 (s, 2H, NCH<sub>2</sub>-pyrimidine), 3.69 (s, 4H, piperazine N-CH), 3.84 (s, 3H, pyrazole N-CH<sub>3</sub>), 8.02 (s, 1H) and 8.18 (s, 1H) (imidazo[4,5-*b*]pyridine 5-H and pyrazole 5-H), 8.78 (s, 2H, pyrimidine 4-H and pyrimidine 6-H) 9.11 (s, 1H, pyrimidine 2-H), 12.96 (br s, 1H, imidazo[4,5-*b*]pyridine N-H); LC - MS (ESI, *m/z*): Rt = 1.58 min – 424, 426 [(M+H)<sup>+</sup>, Cl isotopic pattern]; HRMS: Found: 424.1761, calculated for C<sub>20</sub>H<sub>23</sub>ClN<sub>9</sub> (M+H)<sup>+</sup>: 424.1760.

***tert*-Butyl 4-(pyrazin-2-ylmethyl)piperazine-1-carboxylate (24g)**

To a solution of 1-Boc-piperazine (0.298 g, 1.60 mmol) in anhydrous dichloromethane (22 mL) was added pyrazine-2-carbaldehyde (0.173 g, 1.60 mmol) followed by sodium triacetoxyborohydride (0.392g, 1.76 mmol) and acetic acid (0.096 g, 1.6 mmol). The reaction mixture was stirred at room temperature for 6.5 h; it was then diluted with dichloromethane (25 mL) and washed with a 10% aqueous NaHCO<sub>3</sub> solution (2 x 35 mL), and brine (30 mL). The organic layer was dried (MgSO<sub>4</sub>), and concentrated in vacuo to afford the title compound as a yellow oily residue (0.403 g, 91%). <sup>1</sup>H-NMR (500 MHz, DMSO-d<sub>6</sub>) 1.39 (s, 9H, CO<sub>2</sub>(CH<sub>3</sub>)<sub>3</sub>), 2.39 (t, J = 5.2 Hz, 4H, piperazine N-CH<sub>2</sub>), 3.32 (t, J = 4.60 Hz, 4H, piperazine N-CH<sub>2</sub>), 3.67 (s, 2H, NCH<sub>2</sub>-pyrazine), 8.53 (d, J = 2.5 Hz, 1H, pyrazine C-H), 8.57 (dd, J = 1.4, 2.2 Hz, 1H, pyrazine C-H), 8.68 (d, J = 1.2 Hz, 1H, pyrazine C-H); LC - MS (ESI, *m/z*): Rt = 1.20 min – 223 [(M-<sup>t</sup>Bu)<sup>+</sup>, 80%], 179 (M-BOC)<sup>+</sup>, 100%].

**5-Chloro-3-nitro-4-(4-(pyrazin-2-ylmethyl)piperazin-1-yl)pyridin-2-amine (26g)**

A solution of *tert*-butyl 4-(pyrazin-2-ylmethyl)piperazine-1-carboxylate (0.336 g, 1.21 mmol) in TFA (7 mL) and dichloromethane (10 mL) was stirred at room temperature for 2 h. The solvents were then removed under reduced pressure and azeotroped with toluene. The resultant residue (**25g**) was dissolved in isopropanol (20 mL), and to this solution 4,5-dichloro-3-nitropyridin-2-amine (0.235 g, 1.13 mmol) was added followed by diisopropylethylamine (1.07 mL, 6.0 mmol). The reaction mixture was stirred at 45 °C for 20 h; it was then allowed to cool to room temperature and diluted with isopropanol (10 mL). The yellow precipitate was collected by filtration, washed with isopropanol, diethyl ether, and

dried (0.195 g, 47%). <sup>1</sup>H-NMR (500 MHz, DMSO-d<sub>6</sub>) 2.58 (br s, 4H, piperazine N-CH), 3.08 (br t, J = 4.4 Hz, 4H, piperazine N-CH), 3.73 (s, 2H, NCH<sub>2</sub>-pyrazine), 6.95 (s, 2H, NH<sub>2</sub>), 8.06 (s, 1H, pyridine 6-H), 8.54 (d, J = 2.5 Hz, 1H, pyrazine C-H), 8.58 (dd, J = 1.5, 2.5 Hz, 1H, pyrazine C-H), 8.71 (d, J = 1.3 Hz, 1H, pyrazine C-H); LC - MS (ESI, *m/z*): Rt = 1.16 min – 350, 352 [(M+H)<sup>+</sup>, Cl isotopic pattern].

**6-Chloro-2-(1,3-dimethyl-1H-pyrazol-4-yl)-7-(4-(pyrazin-2-ylmethyl)piperazin-1-yl)-3H-imidazo[4,5-*b*]pyridine (27g)**

To a mixture of 5-chloro-3-nitro-4-(4-(pyrazin-2-ylmethyl)piperazin-1-yl)pyridin-2-amine (0.070 g, 0.20 mmol) and EtOH (3.5 mL) was added 1,3-dimethyl-1H-pyrazole-4-carbaldehyde (0.028 g, 0.22 mmol) followed by a freshly prepared aqueous solution of Na<sub>2</sub>S<sub>2</sub>O<sub>4</sub> (1M; 0.90 mL, 0.90 mmol). The reaction mixture was stirred at 80 °C for 20 h, it was then allowed to cool to room temperature, and concentrated *in vacuo*. The resultant residue was absorbed on silica gel, placed on a 10 g isolute silica column which was first eluted with ethyl acetate / dichloromethane (v:v; 1:1), then 5%, 10% methanol in ethyl acetate / dichloromethane (v:v; 1:1), and finally 10% methanol in ethyl acetate. The product obtained was triturated with diethyl ether, the yellow precipitate was collected by filtration, and successively washed with diethyl ether (2 x 5 mL), water (4 x 3 mL), diethyl ether (3 x 4 mL), then dried *in vacuo* over P<sub>2</sub>O<sub>5</sub> (0.010 g, 12%); <sup>1</sup>H-NMR (500 MHz, DMSO-d<sub>6</sub>) 2.51 (s, 3H, pyrazole-CH<sub>3</sub>), 2.67 (br s, 4H, piperazine N-CH), 3.70 (br t, J = 4.5 Hz, 4H, piperazine N-CH), 3.76 (s, 2H, NCH<sub>2</sub>-pyrazine), 3.84 (s, 3H, pyrazole N-CH<sub>3</sub>), 8.02 (s, 1H) and 8.18 (s, 1H) (imidazo[4,5-*b*]pyridine 5-H and pyrazole 5-H), 8.54 (d, J = 2.7 Hz, 1H, pyrazine C-H), 8.60 (m, 1H, pyrazine C-H), 8.74 (d, J = 1.2 Hz, 1H, pyrazine C-H), 12.97 (br s, 1H,



imidazo[4,5-*b*]pyridine N-H); LC - MS (ESI,  $m/z$ ):  $R_t = 1.60$  min – 424, 426 [(M+H)<sup>+</sup>, Cl isotopic pattern]. HRMS: Found: 424.1758, calculated for C<sub>20</sub>H<sub>23</sub>ClN<sub>9</sub> (M+H)<sup>+</sup>: 424.1759.

**Table S1:** Summary of Crystallographic Analysis of Compound **21a**

| <b>Crystals</b>            |                                          |
|----------------------------|------------------------------------------|
| Spacegroup                 | <i>P</i> 4 <sub>1</sub> 2 <sub>1</sub> 2 |
| Lattice constants          |                                          |
| <i>a</i> (Å)               | 83.56                                    |
| <i>b</i> (Å)               | 83.56                                    |
| <i>c</i> (Å)               | 76.15                                    |
| α, β, γ (°)                | 90.00                                    |
| <b>Data collection</b>     |                                          |
| X-ray source               | DIAMOND I03                              |
| Resolution range (Å)       | 76.25-2.50 (2.64-2.5)                    |
| (Highest resolution shell) |                                          |
| Unique reflections         | 9,791                                    |
| Completeness(%)            | 99.7 (100.0)                             |
| Multiplicity               | 4.0 (4.2)                                |
| Rmerge (%)                 | 8.3 (32.7)                               |
| I/σ(I)                     | 14.4 (3.5)                               |
| <b>Refinement</b>          |                                          |
| Resolution range (Å)       | 19.80-2.50                               |
| Rfactor (%)                | 20.20                                    |
| Rfree <sup>a</sup> (%)     | 26.30                                    |
| RMSD bonds (Å)             | 0.008                                    |
| RMSD angles (°)            | 1.16                                     |
| Average B                  | 44.1                                     |
| <b>Molprobit analysis</b>  |                                          |
| Ramachandran favored (%)   | 96.7                                     |
| Ramachandran outliers (%)  | 0.8                                      |
| Rotamer outliers (%)       | 8.6                                      |
| Clashscore (%)             | 10.76                                    |

<sup>a</sup> Free Rfactor was computed using 5% of the data assigned randomly (Brunger, 1992).

**Table S2:** Kinase selectivity profiling of compound **27e** in a 442-kinase panel screened at a concentration of 1  $\mu$ M; KINOMEScan™ technology.

| KINOMEScan Gene Symbol        | Entrez Gene Symbol | Percent Control |
|-------------------------------|--------------------|-----------------|
| AAK1                          | AAK1               | 97              |
| ABL1(E255K)-phosphorylated    | ABL1               | 77              |
| ABL1(F317I)-nonphosphorylated | ABL1               | 100             |
| ABL1(F317I)-phosphorylated    | ABL1               | 65              |
| ABL1(F317L)-nonphosphorylated | ABL1               | 100             |
| ABL1(F317L)-phosphorylated    | ABL1               | 89              |
| ABL1(H396P)-nonphosphorylated | ABL1               | 100             |
| ABL1(H396P)-phosphorylated    | ABL1               | 99              |
| ABL1(M351T)-phosphorylated    | ABL1               | 60              |
| ABL1(Q252H)-nonphosphorylated | ABL1               | 100             |
| ABL1(Q252H)-phosphorylated    | ABL1               | 84              |
| ABL1(T315I)-nonphosphorylated | ABL1               | 100             |
| ABL1(T315I)-phosphorylated    | ABL1               | 85              |
| ABL1(Y253F)-phosphorylated    | ABL1               | 100             |
| ABL1-nonphosphorylated        | ABL1               | 94              |
| ABL1-phosphorylated           | ABL1               | 100             |
| ABL2                          | ABL2               | 100             |
| ACVR1                         | ACVR1              | 90              |
| ACVR1B                        | ACVR1B             | 68              |
| ACVR2A                        | ACVR2A             | 100             |
| ACVR2B                        | ACVR2B             | 72              |
| ACVRL1                        | ACVRL1             | 100             |
| ADCK3                         | CABC1              | 80              |
| ADCK4                         | ADCK4              | 45              |
| AKT1                          | AKT1               | 100             |
| AKT2                          | AKT2               | 100             |
| AKT3                          | AKT3               | 100             |
| ALK                           | ALK                | 100             |
| AMPK-alpha1                   | PRKAA1             | 2.4             |
| AMPK-alpha2                   | PRKAA2             | 0.9             |
| ANKK1                         | ANKK1              | 89              |
| ARK5                          | NUAK1              | 9.6             |
| ASK1                          | MAP3K5             | 100             |
| ASK2                          | MAP3K6             | 100             |
| AURKA                         | AURKA              | 3.4             |
| AURKB                         | AURKB              | 1               |
| AURKC                         | AURKC              | 16              |
| AXL                           | AXL                | 2.2             |
| BIKE                          | BMP2K              | 6.7             |

|               |        |     |
|---------------|--------|-----|
| BLK           | BLK    | 100 |
| BMPR1A        | BMPR1A | 62  |
| BMPR1B        | BMPR1B | 100 |
| BMPR2         | BMPR2  | 100 |
| BMX           | BMX    | 100 |
| BRAF          | BRAF   | 100 |
| BRAF(V600E)   | BRAF   | 100 |
| BRK           | PTK6   | 96  |
| BRSK1         | BRSK1  | 100 |
| BRSK2         | BRSK2  | 100 |
| BTK           | BTK    | 100 |
| CAMK1         | CAMK1  | 100 |
| CAMK1D        | CAMK1D | 100 |
| CAMK1G        | CAMK1G | 100 |
| CAMK2A        | CAMK2A | 95  |
| CAMK2B        | CAMK2B | 94  |
| CAMK2D        | CAMK2D | 94  |
| CAMK2G        | CAMK2G | 100 |
| CAMK4         | CAMK4  | 100 |
| CAMKK1        | CAMKK1 | 100 |
| CAMKK2        | CAMKK2 | 100 |
| CASK          | CASK   | 84  |
| CDC2L1        | CDK11B | 100 |
| CDC2L2        | CDC2L2 | 100 |
| CDC2L5        | CDK13  | 77  |
| CDK11         | CDK19  | 100 |
| CDK2          | CDK2   | 60  |
| CDK3          | CDK3   | 95  |
| CDK4-cyclinD1 | CDK4   | 76  |
| CDK4-cyclinD3 | CDK4   | 74  |
| CDK5          | CDK5   | 76  |
| CDK7          | CDK7   | 100 |
| CDK8          | CDK8   | 75  |
| CDK9          | CDK9   | 100 |
| CDKL1         | CDKL1  | 100 |
| CDKL2         | CDKL2  | 29  |
| CDKL3         | CDKL3  | 100 |
| CDKL5         | CDKL5  | 99  |
| CHEK1         | CHEK1  | 100 |
| CHEK2         | CHEK2  | 100 |
| CIT           | CIT    | 83  |
| CLK1          | CLK1   | 63  |
| CLK2          | CLK2   | 77  |
| CLK3          | CLK3   | 88  |
| CLK4          | CLK4   | 100 |

|                           |          |     |
|---------------------------|----------|-----|
| CSF1R                     | CSF1R    | 50  |
| CSK                       | CSK      | 100 |
| CSNK1A1                   | CSNK1A1  | 77  |
| CSNK1A1L                  | CSNK1A1L | 93  |
| CSNK1D                    | CSNK1D   | 100 |
| CSNK1E                    | CSNK1E   | 99  |
| CSNK1G1                   | CSNK1G1  | 100 |
| CSNK1G2                   | CSNK1G2  | 96  |
| CSNK1G3                   | CSNK1G3  | 100 |
| CSNK2A1                   | CSNK2A1  | 97  |
| CSNK2A2                   | CSNK2A2  | 67  |
| CTK                       | MATK     | 82  |
| DAPK1                     | DAPK1    | 80  |
| DAPK2                     | DAPK2    | 80  |
| DAPK3                     | DAPK3    | 84  |
| DCAMKL1                   | DCLK1    | 80  |
| DCAMKL2                   | DCLK2    | 100 |
| DCAMKL3                   | DCLK3    | 14  |
| DDR1                      | DDR1     | 55  |
| DDR2                      | DDR2     | 96  |
| DLK                       | MAP3K12  | 81  |
| DMPK                      | DMPK     | 100 |
| DMPK2                     | CDC42BPG | 100 |
| DRAK1                     | STK17A   | 13  |
| DRAK2                     | STK17B   | 21  |
| DYRK1A                    | DYRK1A   | 82  |
| DYRK1B                    | DYRK1B   | 75  |
| DYRK2                     | DYRK2    | 100 |
| EGFR                      | EGFR     | 100 |
| EGFR(E746-A750del)        | EGFR     | 94  |
| EGFR(G719C)               | EGFR     | 86  |
| EGFR(G719S)               | EGFR     | 100 |
| EGFR(L747-E749del, A750P) | EGFR     | 100 |
| EGFR(L747-S752del, P753S) | EGFR     | 42  |
| EGFR(L747-T751del,Sins)   | EGFR     | 97  |
| EGFR(L858R)               | EGFR     | 100 |
| EGFR(L858R,T790M)         | EGFR     | 91  |
| EGFR(L861Q)               | EGFR     | 84  |
| EGFR(S752-I759del)        | EGFR     | 60  |
| EGFR(T790M)               | EGFR     | 82  |
| EIF2AK1                   | EIF2AK1  | 100 |
| EPHA1                     | EPHA1    | 90  |
| EPHA2                     | EPHA2    | 100 |
| EPHA3                     | EPHA3    | 100 |
| EPHA4                     | EPHA4    | 100 |

|                       |         |      |
|-----------------------|---------|------|
| EPHA5                 | EPHA5   | 100  |
| EPHA6                 | EPHA6   | 100  |
| EPHA7                 | EPHA7   | 100  |
| EPHA8                 | EPHA8   | 100  |
| EPHB1                 | EPHB1   | 100  |
| EPHB2                 | EPHB2   | 100  |
| EPHB3                 | EPHB3   | 77   |
| EPHB4                 | EPHB4   | 100  |
| EPHB6                 | EPHB6   | 73   |
| ERBB2                 | ERBB2   | 70   |
| ERBB3                 | ERBB3   | 95   |
| ERBB4                 | ERBB4   | 100  |
| ERK1                  | MAPK3   | 100  |
| ERK2                  | MAPK1   | 100  |
| ERK3                  | MAPK6   | 87   |
| ERK4                  | MAPK4   | 96   |
| ERK5                  | MAPK7   | 100  |
| ERK8                  | MAPK15  | 8.2  |
| ERN1                  | ERN1    | 83   |
| FAK                   | PTK2    | 95   |
| FER                   | FER     | 100  |
| FES                   | FES     | 100  |
| FGFR1                 | FGFR1   | 62   |
| FGFR2                 | FGFR2   | 45   |
| FGFR3                 | FGFR3   | 70   |
| FGFR3(G697C)          | FGFR3   | 69   |
| FGFR4                 | FGFR4   | 68   |
| FGR                   | FGR     | 100  |
| FLT1                  | FLT1    | 0.3  |
| FLT3                  | FLT3    | 0.4  |
| FLT3(D835H)           | FLT3    | 0.75 |
| FLT3(D835Y)           | FLT3    | 5.6  |
| FLT3(ITD)             | FLT3    | 3.3  |
| FLT3(K663Q)           | FLT3    | 0.8  |
| FLT3(N841I)           | FLT3    | 0    |
| FLT3(R834Q)           | FLT3    | 97   |
| FLT4                  | FLT4    | 0    |
| FRK                   | FRK     | 100  |
| FYN                   | FYN     | 100  |
| GAK                   | GAK     | 94   |
| GCN2(Kin.Dom.2,S808G) | EIF2AK4 | 100  |
| GRK1                  | GRK1    | 100  |
| GRK4                  | GRK4    | 41   |
| GRK7                  | GRK7    | 97   |
| GSK3A                 | GSK3A   | 100  |

|                              |        |      |
|------------------------------|--------|------|
| GSK3B                        | GSK3B  | 68   |
| HCK                          | HCK    | 100  |
| HIPK1                        | HIPK1  | 66   |
| HIPK2                        | HIPK2  | 70   |
| HIPK3                        | HIPK3  | 50   |
| HIPK4                        | HIPK4  | 85   |
| HPK1                         | MAP4K1 | 74   |
| HUNK                         | HUNK   | 66   |
| ICK                          | ICK    | 92   |
| IGF1R                        | IGF1R  | 100  |
| IKK-alpha                    | CHUK   | 100  |
| IKK-beta                     | IKKBK  | 100  |
| IKK-epsilon                  | IKBKE  | 100  |
| INSR                         | INSR   | 100  |
| INSRR                        | INSRR  | 100  |
| IRAK1                        | IRAK1  | 56   |
| IRAK3                        | IRAK3  | 16   |
| IRAK4                        | IRAK4  | 74   |
| ITK                          | ITK    | 100  |
| JAK1(JH1domain-catalytic)    | JAK1   | 46   |
| JAK1(JH2domain-pseudokinase) | JAK1   | 100  |
| JAK2(JH1domain-catalytic)    | JAK2   | 1.3  |
| JAK3(JH1domain-catalytic)    | JAK3   | 0.85 |
| JNK1                         | MAPK8  | 93   |
| JNK2                         | MAPK9  | 100  |
| JNK3                         | MAPK10 | 100  |
| KIT                          | KIT    | 4.6  |
| KIT(A829P)                   | KIT    | 64   |
| KIT(D816H)                   | KIT    | 71   |
| KIT(D816V)                   | KIT    | 9.2  |
| KIT(L576P)                   | KIT    | 19   |
| KIT(V559D)                   | KIT    | 2.5  |
| KIT(V559D,T670I)             | KIT    | 19   |
| KIT(V559D,V654A)             | KIT    | 83   |
| LATS1                        | LATS1  | 89   |
| LATS2                        | LATS2  | 77   |
| LCK                          | LCK    | 100  |
| LIMK1                        | LIMK1  | 58   |
| LIMK2                        | LIMK2  | 75   |
| LKB1                         | STK11  | 100  |
| LOK                          | STK10  | 100  |
| LRRK2                        | LRRK2  | 100  |
| LRRK2(G2019S)                | LRRK2  | 85   |
| LTK                          | LTK    | 100  |
| LYN                          | LYN    | 86   |

|             |          |     |
|-------------|----------|-----|
| LZK         | MAP3K13  | 88  |
| MAK         | MAK      | 85  |
| MAP3K1      | MAP3K1   | 100 |
| MAP3K15     | MAP3K15  | 66  |
| MAP3K2      | MAP3K2   | 77  |
| MAP3K3      | MAP3K3   | 91  |
| MAP3K4      | MAP3K4   | 94  |
| MAP4K2      | MAP4K2   | 85  |
| MAP4K3      | MAP4K3   | 62  |
| MAP4K4      | MAP4K4   | 88  |
| MAP4K5      | MAP4K5   | 79  |
| MAPKAPK2    | MAPKAPK2 | 100 |
| MAPKAPK5    | MAPKAPK5 | 97  |
| MARK1       | MARK1    | 78  |
| MARK2       | MARK2    | 93  |
| MARK3       | MARK3    | 45  |
| MARK4       | MARK4    | 29  |
| MAST1       | MAST1    | 100 |
| MEK1        | MAP2K1   | 100 |
| MEK2        | MAP2K2   | 100 |
| MEK3        | MAP2K3   | 100 |
| MEK4        | MAP2K4   | 100 |
| MEK5        | MAP2K5   | 58  |
| MEK6        | MAP2K6   | 73  |
| MELK        | MELK     | 100 |
| MERTK       | MERTK    | 100 |
| MET         | MET      | 83  |
| MET(M1250T) | MET      | 93  |
| MET(Y1235D) | MET      | 76  |
| MINK        | MINK1    | 84  |
| MKK7        | MAP2K7   | 100 |
| MKNK1       | MKNK1    | 100 |
| MKNK2       | MKNK2    | 46  |
| MLCK        | MYLK3    | 100 |
| MLK1        | MAP3K9   | 15  |
| MLK2        | MAP3K10  | 5.4 |
| MLK3        | MAP3K11  | 9.8 |
| MRCKA       | CDC42BPA | 40  |
| MRCKB       | CDC42BPB | 55  |
| MST1        | STK4     | 100 |
| MST1R       | MST1R    | 100 |
| MST2        | STK3     | 100 |
| MST3        | STK24    | 85  |
| MST4        | MST4     | 100 |
| MTOR        | MTOR     | 98  |



|                       |             |     |
|-----------------------|-------------|-----|
| MUSK                  | MUSK        | 100 |
| MYLK                  | MYLK        | 89  |
| MYLK2                 | MYLK2       | 61  |
| MYLK4                 | MYLK4       | 94  |
| MYO3A                 | MYO3A       | 100 |
| MYO3B                 | MYO3B       | 100 |
| NDR1                  | STK38       | 86  |
| NDR2                  | STK38L      | 90  |
| NEK1                  | NEK1        | 82  |
| NEK11                 | NEK11       | 100 |
| NEK2                  | NEK2        | 100 |
| NEK3                  | NEK3        | 100 |
| NEK4                  | NEK4        | 82  |
| NEK5                  | NEK5        | 23  |
| NEK6                  | NEK6        | 100 |
| NEK7                  | NEK7        | 100 |
| NEK9                  | NEK9        | 79  |
| NIM1                  | MGC42105    | 100 |
| NLK                   | NLK         | 72  |
| OSR1                  | OXR1        | 66  |
| p38-alpha             | MAPK14      | 71  |
| p38-beta              | MAPK11      | 100 |
| p38-delta             | MAPK13      | 100 |
| p38-gamma             | MAPK12      | 100 |
| PAK1                  | PAK1        | 100 |
| PAK2                  | PAK2        | 97  |
| PAK3                  | PAK3        | 32  |
| PAK4                  | PAK4        | 100 |
| PAK6                  | PAK6        | 100 |
| PAK7                  | PAK7        | 83  |
| PCK1                  | CDK16       | 75  |
| PCK2                  | CDK17       | 97  |
| PCK3                  | CDK18       | 100 |
| PDGFRA                | PDGFRA      | 93  |
| PDGFRB                | PDGFRB      | 4   |
| PDPK1                 | PDPK1       | 100 |
| PFCDPK1(P.falciparum) | CDPK1       | 100 |
| PFPK5(P.falciparum)   | MAL13P1.279 | 100 |
| PFTAIRE2              | CDK15       | 100 |
| PFTK1                 | CDK14       | 100 |
| PHKG1                 | PHKG1       | 100 |
| PHKG2                 | PHKG2       | 100 |
| PIK3C2B               | PIK3C2B     | 100 |
| PIK3C2G               | PIK3C2G     | 100 |
| PIK3CA                | PIK3CA      | 100 |

|                      |          |     |
|----------------------|----------|-----|
| PIK3CA(C420R)        | PIK3CA   | 100 |
| PIK3CA(E542K)        | PIK3CA   | 94  |
| PIK3CA(E545A)        | PIK3CA   | 75  |
| PIK3CA(E545K)        | PIK3CA   | 100 |
| PIK3CA(H1047L)       | PIK3CA   | 100 |
| PIK3CA(H1047Y)       | PIK3CA   | 100 |
| PIK3CA(I800L)        | PIK3CA   | 90  |
| PIK3CA(M1043I)       | PIK3CA   | 92  |
| PIK3CA(Q546K)        | PIK3CA   | 76  |
| PIK3CB               | PIK3CB   | 97  |
| PIK3CD               | PIK3CD   | 81  |
| PIK3CG               | PIK3CG   | 100 |
| PIK4CB               | PI4KB    | 100 |
| PIM1                 | PIM1     | 100 |
| PIM2                 | PIM2     | 100 |
| PIM3                 | PIM3     | 100 |
| PIP5K1A              | PIP5K1A  | 16  |
| PIP5K1C              | PIP5K1C  | 84  |
| PIP5K2B              | PIP4K2B  | 28  |
| PIP5K2C              | PIP4K2C  | 80  |
| PKAC-alpha           | PRKACA   | 57  |
| PKAC-beta            | PRKACB   | 48  |
| PKMYT1               | PKMYT1   | 95  |
| PKN1                 | PKN1     | 16  |
| PKN2                 | PKN2     | 33  |
| PKNB(M.tuberculosis) | pknB     | 56  |
| PLK1                 | PLK1     | 100 |
| PLK2                 | PLK2     | 93  |
| PLK3                 | PLK3     | 88  |
| PLK4                 | PLK4     | 84  |
| PRKCD                | PRKCD    | 100 |
| PRKCE                | PRKCE    | 97  |
| PRKCH                | PRKCH    | 100 |
| PRKCI                | PRKCI    | 97  |
| PRKCQ                | PRKCQ    | 100 |
| PRKD1                | PRKD1    | 100 |
| PRKD2                | PRKD2    | 100 |
| PRKD3                | PRKD3    | 100 |
| PRKG1                | PRKG1    | 100 |
| PRKG2                | PRKG2    | 92  |
| PRKR                 | EIF2AK2  | 95  |
| PRKX                 | PRKX     | 18  |
| PRP4                 | PRPF4B   | 100 |
| PYK2                 | PTK2B    | 100 |
| QSK                  | KIAA0999 | 100 |

|                               |         |     |
|-------------------------------|---------|-----|
| RAF1                          | RAF1    | 69  |
| RET                           | RET     | 1.8 |
| RET(M918T)                    | RET     | 2   |
| RET(V804L)                    | RET     | 2.1 |
| RET(V804M)                    | RET     | 22  |
| RIOK1                         | RIOK1   | 9.2 |
| RIOK2                         | RIOK2   | 97  |
| RIOK3                         | RIOK3   | 2.8 |
| RIPK1                         | RIPK1   | 78  |
| RIPK2                         | RIPK2   | 100 |
| RIPK4                         | RIPK4   | 74  |
| RIPK5                         | DSTYK   | 100 |
| ROCK1                         | ROCK1   | 50  |
| ROCK2                         | ROCK2   | 35  |
| ROS1                          | ROS1    | 100 |
| RPS6KA4(Kin.Dom.1-N-terminal) | RPS6KA4 | 62  |
| RPS6KA4(Kin.Dom.2-C-terminal) | RPS6KA4 | 98  |
| RPS6KA5(Kin.Dom.1-N-terminal) | RPS6KA5 | 100 |
| RPS6KA5(Kin.Dom.2-C-terminal) | RPS6KA5 | 100 |
| RSK1(Kin.Dom.1-N-terminal)    | RPS6KA1 | 100 |
| RSK1(Kin.Dom.2-C-terminal)    | RPS6KA1 | 92  |
| RSK2(Kin.Dom.1-N-terminal)    | RPS6KA3 | 84  |
| RSK3(Kin.Dom.1-N-terminal)    | RPS6KA2 | 100 |
| RSK3(Kin.Dom.2-C-terminal)    | RPS6KA2 | 100 |
| RSK4(Kin.Dom.1-N-terminal)    | RPS6KA6 | 66  |
| RSK4(Kin.Dom.2-C-terminal)    | RPS6KA6 | 89  |
| S6K1                          | RPS6KB1 | 92  |
| SBK1                          | SBK1    | 80  |
| SgK110                        | SgK110  | 15  |
| SGK3                          | SGK3    | 100 |
| SIK                           | SIK1    | 100 |
| SIK2                          | SIK2    | 36  |
| SLK                           | SLK     | 100 |
| SNARK                         | NUAK2   | 32  |
| SNRK                          | SNRK    | 100 |
| SRC                           | SRC     | 100 |
| SRMS                          | SRMS    | 100 |
| SRPK1                         | SRPK1   | 7.8 |
| SRPK2                         | SRPK2   | 97  |
| SRPK3                         | SRPK3   | 39  |
| STK16                         | STK16   | 18  |
| STK33                         | STK33   | 100 |
| STK35                         | STK35   | 75  |
| STK36                         | STK36   | 74  |
| STK39                         | STK39   | 100 |

|                              |        |     |
|------------------------------|--------|-----|
| SYK                          | SYK    | 100 |
| TAK1                         | MAP3K7 | 100 |
| TAOK1                        | TAOK1  | 79  |
| TAOK2                        | TAOK2  | 73  |
| TAOK3                        | TAOK3  | 87  |
| TBK1                         | TBK1   | 90  |
| TEC                          | TEC    | 100 |
| TESK1                        | TESK1  | 87  |
| TGFBR1                       | TGFBR1 | 83  |
| TGFBR2                       | TGFBR2 | 100 |
| TIE1                         | TIE1   | 47  |
| TIE2                         | TEK    | 56  |
| TLK1                         | TLK1   | 66  |
| TLK2                         | TLK2   | 92  |
| TNIK                         | TNIK   | 93  |
| TNK1                         | TNK1   | 60  |
| TNK2                         | TNK2   | 98  |
| TNNI3K                       | TNNI3K | 93  |
| TRKA                         | NTRK1  | 80  |
| TRKB                         | NTRK2  | 44  |
| TRKC                         | NTRK3  | 57  |
| TRPM6                        | TRPM6  | 100 |
| TSSK1B                       | TSSK1B | 100 |
| TTK                          | TTK    | 100 |
| TXK                          | TXK    | 100 |
| TYK2(JH1domain-catalytic)    | TYK2   | 6.2 |
| TYK2(JH2domain-pseudokinase) | TYK2   | 100 |
| TYRO3                        | TYRO3  | 73  |
| ULK1                         | ULK1   | 78  |
| ULK2                         | ULK2   | 100 |
| ULK3                         | ULK3   | 85  |
| VEGFR2                       | KDR    | 12  |
| VRK2                         | VRK2   | 100 |
| WEE1                         | WEE1   | 96  |
| WEE2                         | WEE2   | 99  |
| YANK1                        | STK32A | 100 |
| YANK2                        | STK32B | 100 |
| YANK3                        | STK32C | 100 |
| YES                          | YES1   | 96  |
| YSK1                         | STK25  | 70  |
| YSK4                         | YSK4   | 67  |
| ZAK                          | ZAK    | 71  |
| ZAP70                        | ZAP70  | 100 |
